1                   **Critical Role for Isoprenoids in Apicoplast Biogenesis by Malaria Parasites**  
2  
3  
4  
5  
6

7                   **Megan Okada<sup>1</sup>, Krithika Rajaram<sup>2</sup>, Russell P. Swift<sup>2</sup>, Amanda Mixon<sup>1</sup>, John Alan**  
8                                   **Maschek<sup>3</sup>, Sean T. Prigge<sup>2</sup>, Paul A. Sigala<sup>1\*</sup>**  
9

10                   <sup>1</sup>Department of Biochemistry, University of Utah School of Medicine, Salt Lake City, Utah,  
11 United States; <sup>2</sup>Department of Molecular Microbiology and Immunology, Johns Hopkins School  
12 of Public Health, Baltimore, Maryland, United States; <sup>3</sup>Metabolomics Core, University of Utah  
13 Health Sciences Center, Salt Lake City, Utah, United States  
14

15                                   \*For correspondence: [p.sigala@biochem.utah.edu](mailto:p.sigala@biochem.utah.edu)  
16  
17  
18  
19  
20  
21  
22  
23  
24  
25  
26  
27  
28  
29  
30  
31  
32  
33  
34  
35  
36  
37  
38  
39  
40  
41  
42  
43  
44  
45  
46

47 **ABSTRACT**

48

49 Isopentenyl pyrophosphate (IPP) is an essential metabolic output of the apicoplast organelle in  
50 *Plasmodium falciparum* malaria parasites and is required for prenylation-dependent vesicular  
51 trafficking and other cellular processes. We have elucidated a critical and previously  
52 uncharacterized role for IPP in apicoplast biogenesis. Inhibiting IPP synthesis blocks apicoplast  
53 elongation and inheritance by daughter merozoites, and apicoplast biogenesis is rescued by  
54 exogenous IPP and polyprenols. Knockout of the only known isoprenoid-dependent apicoplast  
55 pathway, tRNA prenylation by MiaA, has no effect on blood-stage parasites and thus cannot  
56 explain apicoplast reliance on IPP. However, we have localized an annotated polyprenyl synthase  
57 (PPS) to the apicoplast lumen. PPS knockdown is lethal to parasites, rescued by IPP, and blocks  
58 apicoplast biogenesis, thus explaining apicoplast dependence on isoprenoid synthesis. We  
59 hypothesize that PPS synthesizes long-chain polyprenols critical for apicoplast membrane fluidity  
60 and biogenesis. This work critically expands the paradigm for isoprenoid utilization in malaria  
61 parasites and identifies a novel essential branch of apicoplast metabolism suitable for therapeutic  
62 targeting.

63

64

65

66

67

68

69

70

71 **INTRODUCTION:** *Plasmodium falciparum* malaria parasites are single-celled eukaryotes that  
72 harbor a non-photosynthetic plastid organelle called the apicoplast which houses core metabolic  
73 pathways and is essential for parasite viability.<sup>1</sup> Because human cells lack this organelle and many  
74 of its constituent enzymes, the apicoplast has been viewed as a potentially rich source of new  
75 parasite-specific drug targets. However, cashing in on this potential has proved challenging, since  
76 many apicoplast pathways, including heme<sup>2, 3</sup> and fatty acid synthesis<sup>4, 5</sup>, are dispensable during  
77 parasite infection of erythrocytes when all malaria symptoms arise. Multiple antibiotics, including  
78 doxycycline and clindamycin, block apicoplast biogenesis and inheritance and kill parasites, but  
79 their slow activity over several lifecycles has been a fundamental limitation to broad clinical  
80 application.<sup>6</sup>

81 A key, essential function of the apicoplast is biosynthesis and export of the isomeric  
82 isoprenoid precursors, isopentenyl pyrophosphate (IPP) and dimethylallyl pyrophosphate  
83 (DMAPP), via the non-mevalonate/methylerythritol phosphate (MEP) pathway. IPP and DMAPP,  
84 which can be interconverted by an IPP isomerase, are critical for diverse cellular processes that  
85 include prenylation of proteins involved in vesicular trafficking, dolichol-mediated protein  
86 glycosylation, and biosynthesis of mitochondrial ubiquinone and heme A.<sup>7-10</sup> Indeed, exogenous  
87 IPP is able to rescue parasites from lethal apicoplast dysfunction or disruption, highlighting the  
88 essential requirement for this isoprenoid precursor outside the apicoplast in blood-stage parasites.<sup>11</sup>  
89 Consistent with these critical cellular roles for IPP, the MEP pathway inhibitor fosmidomycin  
90 (FOS) kills parasites in the first lifecycle of treatment.<sup>8, 11, 12</sup> This first-cycle FOS activity contrasts  
91 with the delayed, second-cycle death observed for *Plasmodium* parasites treated with antibiotics  
92 such as doxycycline and clindamycin that are thought to block translation of the 35-kb apicoplast  
93 genome and the predominantly organelle-maintenance pathways it encodes. These contrasting

94 kinetics have led to a prevailing view in the literature that essential apicoplast functions can be  
95 segregated into two general categories: (1) anabolic pathways that produce metabolites required  
96 outside the apicoplast and whose inhibition causes first-cycle parasite death or (2) housekeeping  
97 pathways that are only required for organelle maintenance and whose inhibition causes delayed,  
98 second-cycle defects.<sup>13-15</sup> Although this simple paradigm has been useful for conceptualizing  
99 general apicoplast functions, exceptions to this model have been reported<sup>12, 16-18</sup> and thus its  
100 general validity remains uncertain.

101         Since exogenous IPP rescues parasites from lethal apicoplast disruption,<sup>11</sup> isoprenoid  
102 biosynthesis has been thought to only serve essential roles outside this organelle.<sup>7, 12, 15, 16, 19-21</sup>  
103 Indeed, *P. falciparum* expresses an essential cytoplasmic polyprenyl synthase (PF3D7\_1128400)  
104 whose dual farnesyl/geranylgeranyl pyrophosphate synthase (FPPS/GGPPS) activity is critical for  
105 condensing isoprenoid precursors into longer polyprenyl-PP groups required for diverse cellular  
106 processes such as protein prenylation and dolichol synthesis.<sup>19, 22, 23</sup> In addition, known  
107 prenyltransferases, which attach prenyl groups such as FPP and GGPP to client proteins, are also  
108 cytoplasmic.<sup>20</sup>

109         In contrast to this prevailing paradigm, we have unraveled a novel essential arm of  
110 isoprenoid metabolism and utilization within the apicoplast and provide direct evidence that IPP  
111 and its condensation into downstream linear isoprenoids are required for apicoplast branching and  
112 inheritance by daughter merozoites. Genetic knockout of MiaA-dependent tRNA prenylation, the  
113 only previously predicted isoprenoid-dependent pathway in the apicoplast,<sup>1</sup> has no effect on blood-  
114 stage parasites, and thus MiaA cannot account for apicoplast dependence on IPP. However, we  
115 have localized a previously annotated polyprenyl synthase (PPS, PF3D7\_0202700)<sup>24</sup> to the  
116 apicoplast lumen and show that its conditional knockdown is lethal to parasites, can be rescued by

117 IPP and long- but not short-chain polyprenols, and blocks apicoplast inheritance. We posit that  
118 this apicoplast PPS functions downstream of IPP synthesis to produce longer-chain isoprenoids  
119 essential for apicoplast membrane fluidity during organelle biogenesis. This discovery critically  
120 expands the paradigm for isoprenoid utilization in *P. falciparum*, identifies a potential new  
121 apicoplast drug target, and uncovers an organelle maintenance pathway whose inhibition causes  
122 first-cycle defects in apicoplast inheritance in contrast to delayed death-inducing antibiotics.

123

## 124 **RESULTS**

125 **Apicoplast elongation and branching require isoprenoid precursor synthesis.** The *P.*  
126 *falciparum* literature has focused almost exclusively on the essential roles of isoprenoid  
127 metabolism outside the apicoplast.<sup>7, 11, 14, 15, 19, 20</sup> Nevertheless, several prior studies reported that  
128 MEP-pathway inhibitors such as FOS and MMV008138 blocked apicoplast elongation in lethally  
129 treated parasites, suggesting a possible role for IPP in apicoplast biogenesis.<sup>25-27</sup> These prior  
130 studies, however, could not rule out that defects in apicoplast development caused by MEP-  
131 pathway inhibitors were due to non-specific effects from the pleiotropic cellular dysfunctions  
132 inherent to parasite death.<sup>19</sup> We revisited FOS inhibition of apicoplast biogenesis to further test  
133 and distinguish specific versus non-specific effects on organelle development.

134 We first tested the effect of 10  $\mu$ M FOS (10x EC<sub>50</sub>) on apicoplast elongation in  
135 synchronized cultures of two different parasite strains: D10 parasites expressing the apicoplast-  
136 targeted acyl carrier protein (ACP) leader sequence fused to GFP (ACP<sub>L</sub>-GFP)<sup>28</sup> and a recently  
137 published NF54 parasite line (PfMev) that expresses ACP<sub>L</sub>-GFP as well as heterologous enzymes  
138 that enable cytoplasmic synthesis of IPP from exogenous mevalonate precursor, independent of  
139 the apicoplast MEP pathway.<sup>29</sup> Consistent with prior reports,<sup>25-27, 30</sup> we observed that synchronized

140 ring-stage parasites treated with FOS developed into multi-nuclear schizonts but failed to elongate  
141 the apicoplast, which retained a focal, unbranched morphology in PfMev (Figure 1A) and D10  
142 parasites (Figure 1- figure supplements 1-3). Although MEP pathway activity is detectable in ring-  
143 stage parasites,<sup>31, 32</sup> identical inhibition of apicoplast elongation in schizonts was observed if FOS  
144 was added to trophozoites 12 hours after synchronization (Figure 1, A and C, and Figure 1- figure  
145 supplement 2), suggesting continued reliance on de novo synthesis. In contrast to FOS treatment,  
146 parasites treated with lethal doses (10-100x EC<sub>50</sub>) of drugs that target processes outside the  
147 apicoplast, including DSM1 (mitochondrial dihydroorotate dehydrogenase inhibitor),<sup>33</sup>  
148 atovaquone (ATV, mitochondrial cytochrome b inhibitor),<sup>34</sup> blasticidin-S (Blast-S, cytoplasmic  
149 translation inhibitor),<sup>35</sup> or WR99210 (WR, cytoplasmic dihydrofolate reductase inhibitor),<sup>36</sup>  
150 exhibited normal apicoplast biogenesis as they developed into schizonts, very similar to untreated  
151 parasites (Figure 1, B and C, and Figure 1- figure supplement 2). These observations strongly  
152 suggest that defects in apicoplast elongation observed with FOS treatment are due to specific  
153 inhibition of MEP pathway activity rather than non-specific, secondary effects of parasite death.

154 Multiple studies have reported that FOS-treated parasites grow normally in the presence of  
155 exogenous IPP and do not show evidence of apicoplast loss,<sup>11, 12, 21, 29</sup> suggesting that IPP rescues  
156 apicoplast biogenesis from FOS-induced defects. To directly test this conclusion, we  
157 simultaneously treated synchronized rings with 10  $\mu$ M FOS and either 200  $\mu$ M IPP or 50  $\mu$ M  
158 mevalonate (for PfMev parasites) and observed normal apicoplast elongation and branching in  
159 schizonts (Figure 1, A and C, and Figure 1- figure supplement 2), consistent with a prior report.<sup>26</sup>  
160 These observations directly support the conclusion that apicoplast elongation requires isoprenoid  
161 synthesis.

162 To further test this conclusion via genetic disruption rather than pharmacological  
 163 inhibition, we utilized a previously reported line of PfMev parasites in which the apicoplast-  
 164 targeted deoxyxylulose-5-phosphate synthase (DXS), the first enzyme in the MEP isoprenoid  
 165 synthesis pathway, had been genetically deleted ( $\Delta$ DXS).<sup>37</sup> These parasites require exogenous  
 166 mevalonate to support cytoplasmic IPP synthesis, since they lack a functional apicoplast MEP  
 167 pathway. In the presence of 50  $\mu$ M mevalonate,  $\Delta$ DXS parasites displayed normal apicoplast  
 168 elongation and branching in schizonts. However, washing out mevalonate from ring-stage  $\Delta$ DXS  
 169 parasites to ablate IPP synthesis resulted in multinuclear schizonts with focal, unbranched  
 170 apicoplast morphologies identical to those observed in the presence of FOS (Figure 1, D and E,  
 171 and Figure 1- figure supplement 4). These results strongly support the conclusion that apicoplast  
 172 elongation and branching require IPP synthesis.

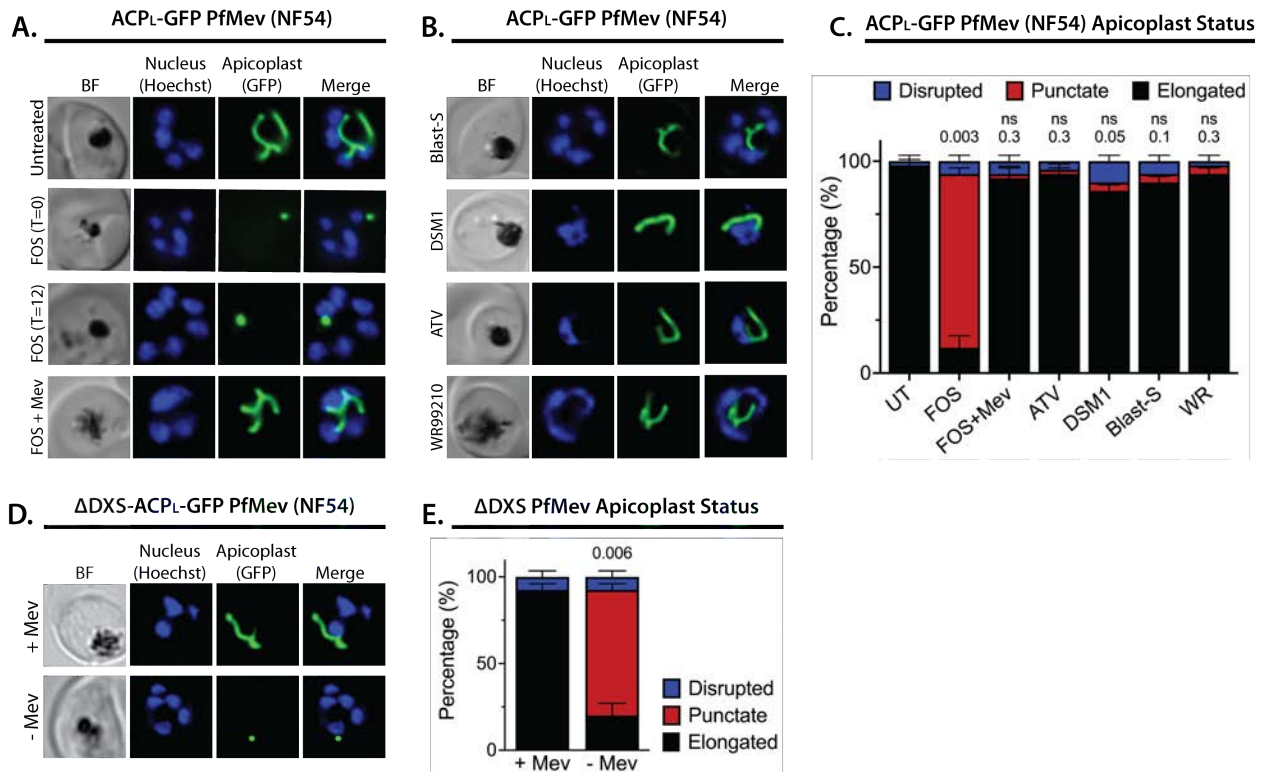

173

174 **Figure 1.** Inhibition of isoprenoid precursor biosynthesis specifically blocks apicoplast elongation  
 175 and branching. Bright field (BF) and fluorescent microscopy images of live NF54 PfMev parasites  
 176 that were (A) untreated or treated with 10  $\mu$ M fosmidomycin (FOS) in the absence or presence of

177 50  $\mu$ M DL-mevalonate (Mev), or **(B)** treated with 6  $\mu$ M blasticidin-S (Blast-S), 2  $\mu$ M DSM1, 100  
178 nM atovaquone (ATV), or 5 nM WR99210. **(C)** Statistical analysis of apicoplast morphology for  
179 50 total parasites imaged for each condition in panels A and B from two independent experiments.  
180 Apicoplast morphologies were scored as punctate (focal), elongated, or disrupted (dispersed);  
181 counted; and plotted by histogram as the fractional population with the indicated morphology.  
182 Error bars represent standard deviations from replicate experiments. Two-tailed unpaired t-test  
183 analysis was used to determine the significance of observed population differences compared to  
184 untreated (UT) parasites (P values given above each condition, ns = not significant). **(D)** Live-cell  
185 imaging of  $\Delta$ DXS PfMev parasites in the presence or absence of 50  $\mu$ M Mev. **(E)** Statistical  
186 analysis of parasites imaged in panel D and performed as in panel C. The P value is for comparison  
187 of apicoplast morphologies  $\pm$ Mev conditions. In all experiments, synchronized ring-stage parasites  
188 were incubated with the indicated treatments for 36 hours prior to live-cell imaging. Parasite nuclei  
189 were visualized using 1  $\mu$ g/ml Hoechst 33342. The parasite apicoplast was visualized using the  
190 ACP<sub>L</sub>-GFP encoded by the PfMev line. Absolute parasite counts for all microscopy experiments  
191 are shown in Figure 1- Source Data 1.

192 **Figure supplement 1.** Additional epifluorescence images of PfMev NF54 parasites treated with  
193 FOS and other drugs.

194 **Figure supplement 2.** Epifluorescence images and analysis of D10 ACP<sub>L</sub>-GFP parasites treated  
195 with FOS and other drugs.

196 **Figure supplement 3.** Additional epifluorescence images of D10 parasites treated with FOS and  
197 other drugs.

198 **Figure supplement 4.** Additional epifluorescence images of  $\Delta$ DXS PfMev parasites cultured  
199  $\pm$ Mev.

200 **Source data 1.** Absolute parasite counts for all microscopy experiments.  
201

202 **Inhibition of isoprenoid synthesis prevents apicoplast inheritance by daughter parasites.** To  
203 stringently test that IPP synthesis is required for apicoplast biogenesis, we next asked if FOS  
204 treatment prevented daughter parasites from inheriting the apicoplast, as predicted to occur if the  
205 apicoplast fails to elongate and divide in schizonts and as commonly observed for antibiotic  
206 inhibitors of apicoplast housekeeping pathways.<sup>12, 38</sup> Simultaneous treatment of ring-stage  
207 parasites with both FOS and IPP rescued growth defects and resulted in normal apicoplast  
208 elongation and division (Figure 1A and Figure 1- figure supplement 1), as expected since IPP is  
209 the direct anabolic product of the MEP pathway specifically inhibited by FOS. Thus, concomitant  
210 treatment with IPP and FOS cannot distinguish whether MEP pathway inhibition prevents



211 apicoplast inheritance by daughter parasites. To bypass this fundamental limitation, we devised  
212 the following alternative strategy.

213         The apicoplast begins to elongate near the onset of schizogony before branching and then  
214 dividing in late, segmenting schizonts.<sup>28, 39</sup> Despite manifesting defects in apicoplast elongation in  
215 early schizogony, FOS-treated parasites continue to divide nuclear DNA and transition into mature  
216 schizonts before stalling prior to segmentation into merozoites (Figure 1A).<sup>30</sup> This observation  
217 suggested that defects in apicoplast biogenesis were not the immediate cause of parasite death in  
218 the present cell cycle and that such defects preceded a broader essential requirement for IPP outside  
219 the apicoplast in mature schizonts. Recent works suggest this broader essentiality to be IPP-  
220 dependent protein prenylation.<sup>15, 30</sup> We therefore reasoned that if IPP supplementation were  
221 delayed until mid-schizogony, after the onset of apicoplast elongation defects but before broader  
222 cellular death, it might be possible to rescue parasite viability without rescuing apicoplast  
223 biogenesis and thereby produce viable parasite progeny that lacked the intact apicoplast.

224         Synchronized ring-stage PfMev parasites were treated with 10  $\mu$ M FOS for 48 hours, with  
225 50  $\mu$ M mevalonate added at 0, 30, 34, or 38 hours after synchronization. (Figure 2A). Parasites  
226 were allowed to expand for three subsequent cycles in 50  $\mu$ M mevalonate, with growth monitored  
227 by flow cytometry. We observed a hierarchy of growth rescue by mevalonate, with full rescue  
228 (relative to no FOS treatment) of parasites supplemented with mevalonate at 0 hours post-  
229 synchronization and decreasing rescue for increasingly delayed supplementation at 30, 34, or 38  
230 hours (Figure 2B), presumably due to fewer viable parasites surviving the initial cycle.

231         To assess and quantify apicoplast status in rescued parasites, we cloned out individual  
232 parasites at 60 hours post-synchronization in the second growth cycle. Apicoplast status in the  
233 resulting clones was determined by live parasite microscopy of organelle morphology, apicoplast

234 genome PCR, and growth  $\pm$  mevalonate. Although FOS-treated parasites supplemented  
 235 simultaneously with mevalonate showed no evidence for apicoplast loss in clonal progeny, a  
 236 fraction of clonal parasites derived from delayed mevalonate rescue showed clear signs of  
 237 apicoplast loss, including a dispersed apicoplast ACP<sub>L</sub>-GFP signal, loss of the apicoplast genome,  
 238 and growth dependence on exogenous mevalonate (Figure 2C and Figure 2- figure supplements  
 239 1–4). The fraction of clonal parasites with a disrupted apicoplast increased from 10% in parasites  
 240 supplemented with mevalonate at 30 hours to over 80% in parasites supplemented at 38 hours  
 241 (Figure 2D). These results provide direct evidence that inhibiting IPP synthesis alone is sufficient  
 242 to block apicoplast biogenesis and prevent organelle inheritance by daughter parasites.

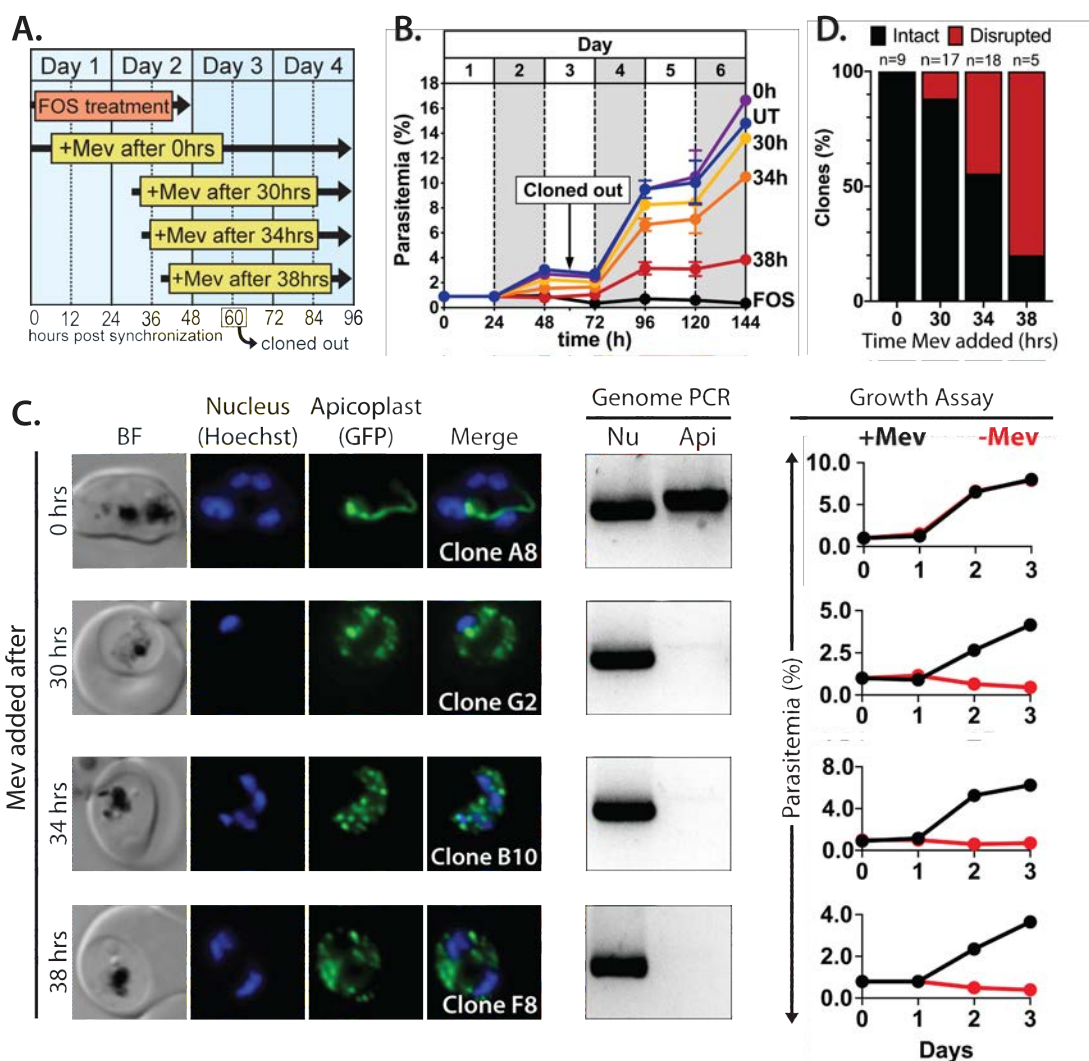

243

244 **Figure 2.** Inhibiting isoprenoid precursor biosynthesis prevents apicoplast inheritance by daughter  
245 parasites. **(A)** Schematic summary of delayed mevalonate rescue of fosmidomycin (FOS)  
246 treatment. PfMev parasites were synchronized with 5% D-sorbitol and cultured in 10  $\mu$ M FOS  
247 (washed out after 48 hours in 2<sup>nd</sup>-cycle rings) without or with addition of 50  $\mu$ M DL-mevalonate  
248 (Mev) at 0, 30, 34, or 38 hours after synchronization. Clonal parasites from all growth conditions  
249 were isolated at 60 hours post-synchronization by limiting dilution and growth in 50  $\mu$ M Mev. **(B)**  
250 Parasite growth was monitored for 6 days by flow cytometry using acridine orange staining (FOS  
251 = treated only with FOS, UT = untreated, 0h – 38h time delay of Mev addition after  
252 synchronization and initiation of FOS treatment). **(C)** Bright-field (BF) and fluorescence  
253 microscopy images of live clonal parasites isolated after 60 hours of growth under the conditions  
254 described in panel A. Parasite nuclei were visualized using 1  $\mu$ g/ml Hoechst 33342. To the right  
255 of each clonal image panel is a gel image showing the result of PCR analysis to amplify a (Nu)  
256 nuclear (PPS, PF3D7\_0202700) and (Api) apicoplast (SufB, PF3D7\_API04700) gene and a  
257 growth assay to monitor the ability of each isolated clone in the presence or absence of 50  $\mu$ M  
258 Mev. Data points are the average of two technical replicates from a single growth assay. Error bars  
259 (stdev) are smaller than the data points. **(D)** Graphical representation of the number of clones  
260 isolated under each growth condition and the clonal percentage with an intact or disrupted  
261 apicoplast (determined by microscope analysis of ACP<sub>L</sub>-GFP signal and genomic PCR).

262 **Figure supplement 1.** Epifluorescence microscopy images of clonal parasites isolated after FOS  
263 treatment and rescue by mevalonate addition at 0 hours after synchronization.

264 **Figure supplement 2.** Epifluorescence microscopy images of clonal parasites isolated after FOS  
265 treatment and rescue by mevalonate addition at 30 hours after synchronization. Clone headers for  
266 parasites with a disrupted apicoplast are yellow.

267 **Figure supplement 3.** Epifluorescence microscopy images of clonal parasites isolated after FOS  
268 treatment and rescue by mevalonate addition at 34 hours after synchronization. Clone headers for  
269 parasites with a disrupted apicoplast are yellow.

270 **Figure supplement 4.** Epifluorescence microscopy images of clonal parasites isolated after FOS  
271 treatment and rescue by mevalonate addition at 38 hours after synchronization. Clone headers for  
272 parasites with a disrupted apicoplast are yellow.

273  
274

275 **The MiaA pathway for apicoplast tRNA prenylation is dispensable for blood-stage parasites.**

276 Why do apicoplast elongation and branching require IPP synthesis? Currently, the only predicted  
277 isoprenoid-dependent metabolic pathway in the apicoplast is tRNA prenylation by MiaA,<sup>1, 20</sup>  
278 which catalyzes the attachment of a dimethylallyl group to the N<sup>6</sup> moiety of adenine at position 37  
279 of certain tRNAs.<sup>40</sup> DMAPP is produced in tandem with IPP in the terminal enzymatic step of the  
280 MEP pathway and can be interconverted with IPP by an IPP/DMAPP isomerase.<sup>7, 11</sup> Prenylation  
281 of A37 is often accompanied by methylthiolation by the radical SAM enzyme, MiaB.<sup>41</sup> Although

282 genes encoding MiaA (PF3D7\_1207600) and MiaB (PF3D7\_0622200) are annotated in the *P.*  
283 *falciparum* genome and MiaA protein has been detected by mass spectrometry in the apicoplast-  
284 specific proteome,<sup>42</sup> neither protein has been directly studied in parasites. Nevertheless, both  
285 proteins are predicted to be non-essential for blood-stage *Plasmodium* based on genome-wide  
286 knockout (KO) studies in *P. berghei*<sup>43</sup> and *P. falciparum*.<sup>44</sup>

287 To directly test whether MiaA function is essential for *P. falciparum* parasites and can  
288 account for apicoplast dependence on isoprenoid synthesis, we used CRISPR/Cas9 to target MiaA  
289 for gene disruption by double-crossover homologous recombination (Figure 3- figure supplement  
290 1). PfMev parasites were transfected and selected in the presence of 50  $\mu$ M mevalonate to ensure  
291 that parasites would remain viable even if deletion of MiaA resulted in apicoplast disruption.  
292 Parasites that had integrated the knock-out plasmid returned from transfection, and loss of the  
293 MiaA gene was confirmed by genomic PCR (Figure 3- figure supplement 1). The  $\Delta$ MiaA parasites  
294 grew equally well in the presence or absence of mevalonate and grew indistinguishably from the  
295 parental PfMev parasites (Figure 3A). The presence of an intact apicoplast was confirmed by  
296 genomic PCR analysis and live parasite microscopy (Figure 3B and Figure 3- figure supplement  
297 1). These results indicate that MiaA is dispensable for blood-stage parasites and that deletion of  
298 this gene does not affect apicoplast biogenesis. Therefore, loss of function of MiaA, the only  
299 predicted isoprenoid-dependent pathway in the apicoplast, cannot account for apicoplast  
300 dependence on IPP synthesis, suggesting an alternative role for IPP in organelle elongation.

301

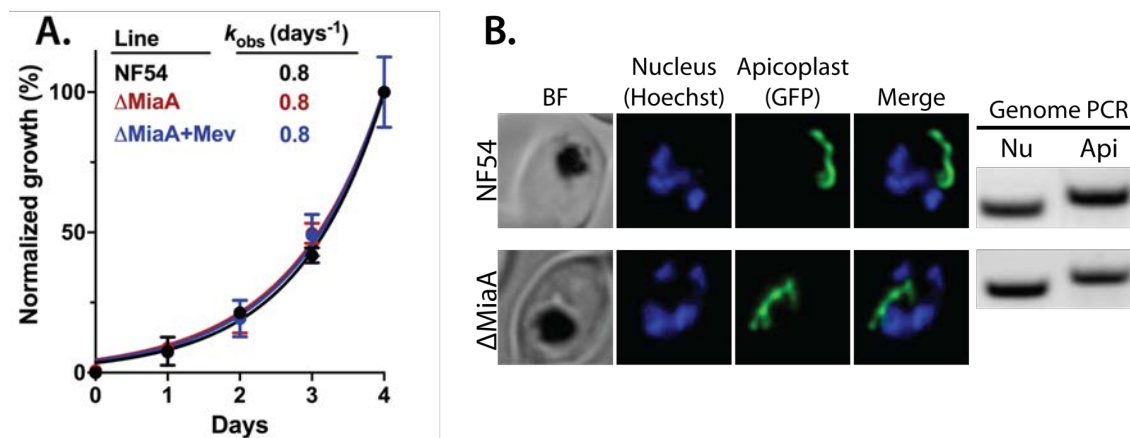

302  
303  
304 **Figure 3.** Genetic disruption of MiaA has no effect on parasite growth or apicoplast biogenesis.  
305 (A) Growth analysis indicates that parental PfMev NF54 parasites and  $\Delta$ MiaA parasites cultured  
306 in the absence or presence of 50  $\mu$ M Mev grow indistinguishably with identical rate constants ( $k_{obs}$ )  
307 for asynchronous culture expansion. Parasitemia values for each sample are the average  $\pm$ SD of  
308 three biological replicates and were normalized to the parasitemia on day 4 and fit with an  
309 exponential growth model. (B) Live-parasite imaging and genomic PCR analysis indicate normal  
310 apicoplast morphology and retention of the apicoplast genome in parental PfMev and  $\Delta$ MiaA  
311 parasites. BF = brightfield, Nu = nuclear gene (LDH, PF3D7\_1324900), and Api = apicoplast gene  
312 (SufB, PF3D7\_API04700).

313 **Figure supplement 1.** PCR genotyping of PfMev  $\Delta$ MiaA parasites and additional epifluorescence  
314 images of apicoplast morphology.

315  
316 **Apicoplast biogenesis requires polyprenyl isoprenoid synthesis.** Except for MiaA-catalyzed  
317 tRNA prenylation, all proposed roles for isoprenoids in *Plasmodium* parasites require head-to-tail  
318 condensation of DMAPP (5 carbons) and one or more IPP subunits (5 carbons) to form longer-  
319 chain isoprenoids, starting with formation of geranyl pyrophosphate (GPP, 10 carbons), farnesyl  
320 pyrophosphate (FPP, 15 carbons), and geranylgeranyl pyrophosphate (GGPP, 20 carbons).<sup>7, 20</sup>  
321 Recent studies reported that 5  $\mu$ M geranylgeraniol (GGOH, the alcohol precursor of GGPP) can  
322 provide short-term (~1 cycle) rescue of parasite death due to treatment with FOS or indolmycin,  
323 an apicoplast tryptophan tRNA synthetase inhibitor.<sup>15, 30</sup> Based on these reports, we hypothesized  
324 that the dependence of apicoplast biogenesis on IPP might reflect a requirement for longer-chain

325 isoprenoids such that farnesol (FOH), GGOH, and/or longer-chain polyprenols might rescue the  
326 apicoplast branching defects caused by 10  $\mu$ M FOS.

327         We treated synchronized NF54 and D10 parasites with both 10  $\mu$ M FOS and 5  $\mu$ M of either  
328 FOH or GGOH. Consistent with prior reports, 5  $\mu$ M GGOH but not FOH partially rescued parasite  
329 growth from inhibition by FOS and enabled culture expansion into a second growth cycle (Figure  
330 4- figure supplement 1). Nevertheless, both GGOH and FOH rescued apicoplast elongation and  
331 branching defects in schizonts when added simultaneously with FOS to synchronized rings (Figure  
332 4 and Figure 4- figure supplements 2 and 3). Rescue of apicoplast branching by FOH and GGOH  
333 strongly suggests that apicoplast biogenesis depends on utilization of polyprenyl isoprenoids of  
334 three or more isoprene units. We extended these rescue experiments to include 5  $\mu$ M decaprenol  
335 (50 carbons) and also observed rescue of apicoplast branching from FOS-induced defects.  
336 However, 5  $\mu$ M  $\beta$ -carotene, which is a nonlinear carotenoid hydrocarbon derived from 8 prenyl  
337 groups (40 carbons), did not rescue apicoplast biogenesis from inhibition by FOS (Figure 4 and  
338 Figure 4- figure supplements 2 and 3). These results directly suggest that apicoplast biogenesis  
339 specifically requires synthesis of linear polyprenols containing three or more prenyl groups.

340         Iterative condensation of DMAPP with IPP subunits to form FPP, GGPP, and longer  
341 polyprenyl-PPs requires the function of a polyprenyl synthase. This family of enzymes uses a  
342 conserved dyad of DDXXD residues positioned near the protein surface of the active site binding  
343 pocket to coordinate  $Mg^{2+}$  ions that bind the pyrophosphate headgroup of DMAPP, GPP, or FPP  
344 and position its allylic head relative to the vinyl tail of the IPP subunit.<sup>45</sup> Condensation of the two  
345 substrates via electrophilic alkylation elongates the nascent isoprenoid chain into the protein  
346 interior. Two amino acids just upstream of the first DDXXD motif determine the length of the  
347 resulting prenyl chain by forming a hydrophobic “floor” that gates the depth of the protein interior.



348 Indeed, dedicated FPPS enzymes feature an amino acid floor comprised of sequential Phe-Phe  
349 residues just upstream of the first DDXXD motif that sterically block synthesis of products longer  
350 than FPP.<sup>46, 47</sup> Sequence variations that replace just the more N-terminal Phe or both Phe-Phe  
351 groups with smaller residues (e.g., Ala or Ser) open up and extend the binding pocket and enable  
352 synthesis of GGPP or longer polyprenyl-PPs up to 14 isoprene units, respectively (Figure 5).<sup>48</sup>

353 A BLAST search of the *P. falciparum* genome with the sequence of the well-studied  
354 chicken FPP synthase (Uniprot P08836) reveals two parasite orthologs (PF3D7\_1128400 and  
355 PF3D7\_0202700) that retain the DDXXD dyads and other conserved sequence features expected  
356 of a polyprenyl synthase (Figure 5A and Figure 5- figure supplement 1). The best studied of these  
357 synthases is the cytosolic enzyme, PF3D7\_1128400, which shares 34% sequence identity with  
358 avian FPPS and has been reported to catalyze formation of both FPP and GGPP.<sup>22, 49, 50</sup> Consistent  
359 with its ability to synthesize GGPP as the terminal product, PF3D7\_1128400 has sequential Ser-  
360 Phe residues just upstream of the first DDXXD motif (Figure 5A).<sup>49, 50</sup> This cytoplasmic enzyme  
361 is reported to be essential based on inhibitor<sup>19, 23</sup> and gene-disruption studies in *P. berghei*<sup>43</sup> and  
362 *P. falciparum*<sup>44</sup> and is thought to synthesize the FPP and GGPP required for broad parasite  
363 isoprenoid metabolism, including protein prenylation and synthesis of dolichols, ubiquinone, and  
364 heme A.<sup>7, 20</sup>

365 We first considered the model that this cytoplasmic FPPS/GGPPS might have an essential  
366 role in producing GGPP required for apicoplast biogenesis. A recent study, however, identified a  
367 specific inhibitor (MMV019313) of PF3D7\_1128400 that is lethal to parasites but does not impact  
368 apicoplast biogenesis.<sup>19</sup> We independently confirmed that lethal treatment with MMV019313 did  
369 not affect apicoplast branching in the PfMev line (Figure 5- figure supplement 2). These  
370 observations strongly suggest that the cytosolic FPPS/GGPPS is not the origin of the polyprenyl

371 synthase activity required for apicoplast biogenesis. Therefore, we turned our attention to the  
 372 second isoprenoid synthase homolog in *P. falciparum*, PF3D7\_0202700, which shares 23%  
 373 sequence identity with avian FPPS.

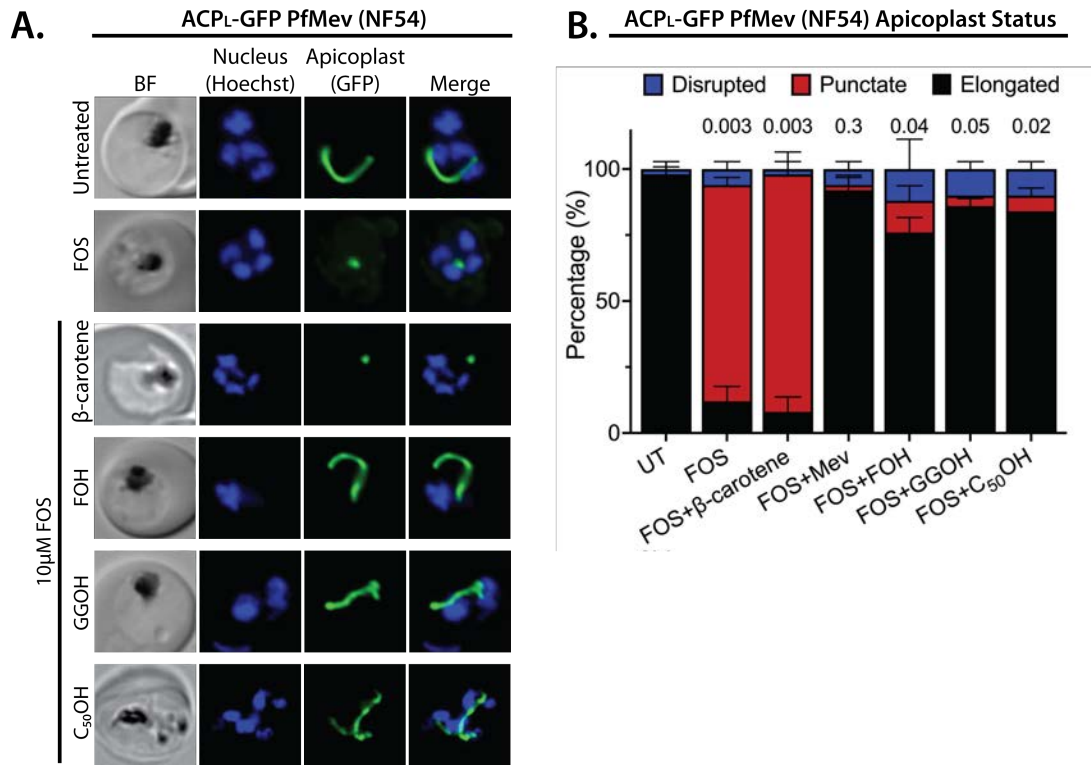

374  
 375  
 376 **Figure 4.** Apicoplast biogenesis requires linear polyprenyl isoprenoid synthesis. (A) 5 μM farnesol  
 377 (FOH), geranylgeraniol (GGOH), or decaprenol (C<sub>50</sub>-OH), but not β-carotene rescues apicoplast  
 378 biogenesis from inhibition by 10 μM FOS in PfMev parasites. Synchronized ring-stage parasites  
 379 were incubated with the indicated treatments for 36 hours and imaged by brightfield (BF) or  
 380 fluorescence microscopy, with visualization of parasite nuclei by Hoechst staining and the  
 381 apicoplast by ACP<sub>L</sub>-GFP signal. (B) Statistical analysis of apicoplast morphology for 50 total  
 382 parasites imaged for each condition in panel A from two independent experiments. Apicoplast  
 383 morphologies were scored as punctate (focal), elongated, or disrupted (dispersed); counted; and  
 384 plotted by histogram as the fractional population with the indicated morphology. Error bars  
 385 represent standard deviations from replicate experiments. Two-tailed unpaired t-test analysis was  
 386 used to determine the significance of observed population differences compared to untreated (UT)  
 387 parasites (P values given above each condition, ns = not significant).

388 **Figure supplement 1.** 5 μM GGOH but not FOH partially rescues parasite growth from inhibition  
 389 by 10 μM FOS in continuous-growth assays with PfMev parasites.

390 **Figure supplement 2.** Additional epifluorescence microscopy images of PfMev parasites treated  
 391 with FOS and FOH, GGOH, C<sub>50</sub>-OH, or β-carotene.



392 **Figure supplement 3.** Epifluorescence microscopy images of D10 ACP<sub>L</sub>-GFP parasites treated  
393 with FOS and FOH, GGOH, C<sub>50</sub>-OH, or  $\beta$ -carotene.

394

395

396 **Localization of an annotated polyprenyl synthase to the apicoplast.** Like the cytoplasmic

397 FPP/GGPP synthase, PF3D7\_0202700 retains the DDXXD sequence dyad expected for a

398 polyprenyl pyrophosphate synthase. In addition, the amino acid floor of PF3D7\_0202700 features

399 a sterically smaller Gly-Ser dyad upstream of the first DDXXD (Figure 5A and figure 5- figure

400 supplement 1) that suggests an ability to synthesize longer-chain isoprenoids greater than four

401 isoprene units. Consistent with these features, sequence similarity searches via NCBI BLAST<sup>51</sup>

402 and MPI HHpred<sup>52</sup> identify polyprenyl synthase homologs from bacteria, algae, and plants that

403 share ~30% sequence identity with PF3D7\_0202700 and have annotated functions in synthesizing

404 polyprenyl isoprenoids of 4 – 10 units (Figure 5- figure supplement 3). Using *E. coli* octaprenyl

405 pyrophosphate synthase (PDB 3WJK, 28% identity) as template, we generated a homology model

406 of PF3D7\_0202700 to visualize the possible structure of its active site (Figure 5B).

407 A prior in vitro study of PF3D7\_0202700 function, using truncated recombinant protein

408 expressed in *E. coli* or impure parasite extracts, reported an ability to synthesize polyprenyl-PP

409 products of 8 – 11 isoprene units.<sup>24</sup> Based on the authors' description, this truncated recombinant

410 protein appears to have lacked one of the DDXXD motifs. Because of this difference from the

411 native protein and the impurity of the parasite-derived protein, it remains possible that the native,

412 pure protein has a distinct product spectrum than previously reported. Nevertheless, this in vitro

413 activity and the general sequence features of PF3D7\_0202700 support its function as a long-chain

414 polyprenyl synthase (PPS).

415 Prior immunofluorescence studies of this PPS, using a polyclonal antibody raised against

416 the truncated recombinant protein, were unable to localize PF3D7\_0202700 to a specific sub-

417 cellular compartment.<sup>53</sup> Analysis of the protein sequence with PlasmoAP<sup>54</sup> suggested the presence  
418 of a subcellular-targeting leader sequence, with strong prediction of an apicoplast-targeting transit  
419 peptide but uncertainty in the presence of a signal peptide. To localize PPS within parasites, we  
420 engineered Dd2 *P. falciparum* lines to episomally express full-length PPS fused to either C-  
421 terminal GFP or RFP. In live parasites, focal PPS-GFP fluorescence was detected in a tubular  
422 compartment proximal to but distinct from the mitochondrion, as expected for apicoplast  
423 localization. Additional immunofluorescence analysis of the PPS-GFP line revealed strong co-  
424 localization between PPS-GFP and the apicoplast acyl carrier protein (ACP) (Figure 5C and Figure  
425 5- figure supplement 4).

426 To further confirm apicoplast targeting of PPS, we stably disrupted the apicoplast in the  
427 PPS-GFP Dd2 line by culturing these parasites in 2  $\mu$ M doxycycline and 200  $\mu$ M IPP for one  
428 week.<sup>11, 55</sup> As expected for an apicoplast-targeted protein, the PPS-GFP signal in these parasites  
429 displayed a constellation of dispersed fluorescent foci, rather than the concentrated signal observed  
430 in untreated parasites (Figure 5D and Figure 5- figure supplement 4). Western blot analysis of the  
431 PPS-RFP parasites revealed two bands at the expected molecular weight of the full-length protein  
432 and a smaller, proteolytically processed form, consistent with import into the apicoplast lumen  
433 (Figure 5E).<sup>28</sup> In the apicoplast-disrupted parasites, however, only a single PPS-RFP band at the  
434 size of the full-length protein was detected, as expected for loss of apicoplast import and lack of  
435 protein processing.<sup>11, 38</sup> On the basis of these observations, we conclude that PF3D7\_0202700 is  
436 an apicoplast-targeted PPS. This localization, the predicted ability of this enzyme to synthesize  
437 polyprenyl PPs longer than 4 isoprenes, and our observation that decaprenol rescued FOS-induced  
438 defects in apicoplast biogenesis all suggested a critical role for this protein in apicoplast  
439 maintenance.

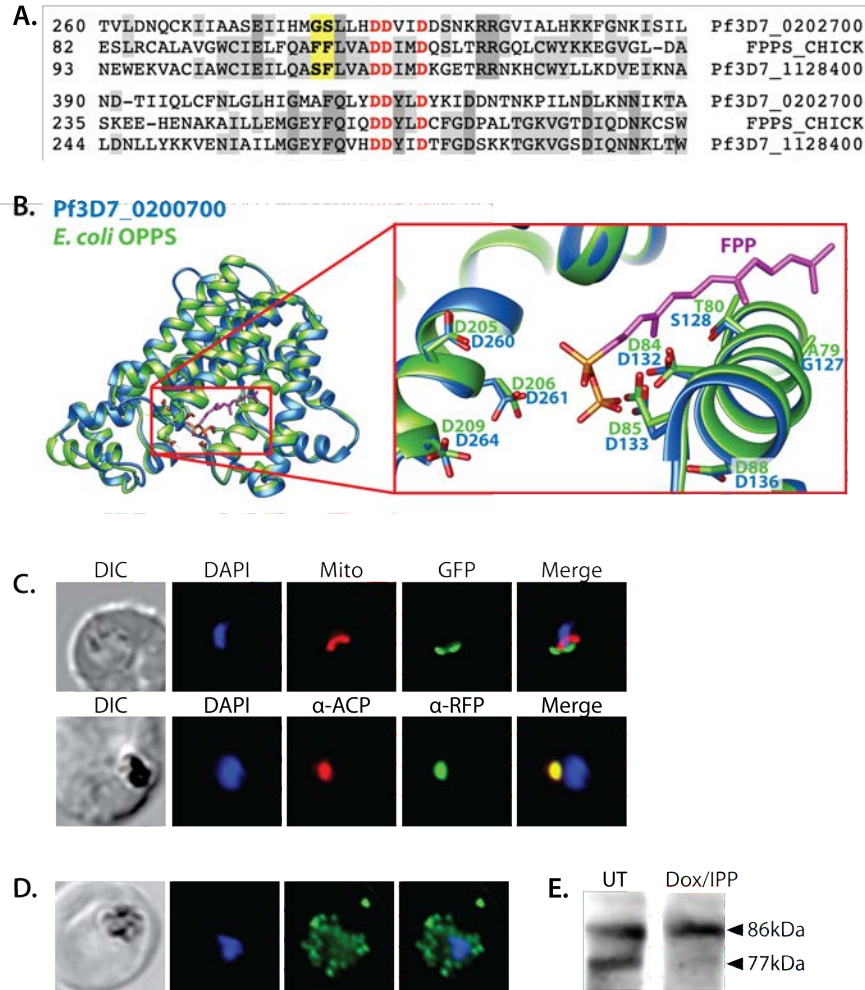

440  
441

442 **Figure 5.** Sequence alignment and localization of the polyprenyl synthase (PPS) PF3D7\_0202700  
 443 to the apicoplast. **(A)** Focal sequence alignment of avian farnesyl pyrophosphate synthase (FPPS,  
 444 Uniprot P08836) with its two *P. falciparum* homologs reveals the presence of conserved metal-  
 445 binding DDXXD motifs (red) expected for polyprenyl synthase activity and chain-length  
 446 determination residues (yellow) upstream of the first DDXXD. **(B)** Homology model of  
 447 PF3D7\_0202700 using *E. coli* octaprenyl pyrophosphate synthase (PDB 3WJK) as a structural  
 448 template. The inset box is an enlargement of the active-site pocket showing the conserved Asp  
 449 residues, bound FPP substrate, and product length-determining residues just upstream of the first  
 450 DDXXD motif. **(C)** Brightfield (BF), fluorescence images (top) of live parasites episomally  
 451 expressing PPS-GFP and stained with 10 nM Mitotracker Red and (bottom) immunofluorescence  
 452 analysis (IFA) images of fixed parasites episomally expressing PPS-RFP stained with anti-RFP  
 453 and anti-apicoplast ACP antibodies. **(D)** IFA images of fixed parasites expressing PPS-RFP that  
 454 had been treated for >7 days with 2  $\mu$ M doxycycline (Dox) and 200  $\mu$ M IPP (to stably induce  
 455 apicoplast loss) and stained with anti-RFP antibody to visualize PPS distribution. **(E)** Western blot  
 456 analysis of untreated (UT) or Dox/IPP-treated parasites episomally expressing PPS-RFP. PPS-RFP  
 457 expression was visualized using an anti-RFP antibody. The full western blot image is included in  
 458 Figure 5- Source Data 1.

459 **Figure supplement 1.** Full sequence alignment of PF3D7\_0202700, PF3D7\_1128400, and avian  
460 FPPS (Uniprot P08836).

461 **Figure supplement 2.** Epifluorescence microscopy images and statistical analysis of PfMev and  
462 D10 parasites treated with 10  $\mu$ M MMV091313.

463 **Figure supplement 3.** Results of sequence-similarity searches for PF3D7\_0202700 using NCBI  
464 BLAST and MPI HHpred.

465 **Figure supplement 4.** Additional epifluorescence microscopy images of Dd2 parasite episomally  
466 expressing PPS-GFP or PPS-RFP.

467 **Source data 1.** Uncropped western blot image detecting PPS-RFP expression in parasites.  
468

469 **PPS is essential for parasite viability and apicoplast biogenesis.** The genomic locus for  
470 PF3D7\_0202700 was reported to be refractory to disruption in recent genome-wide KO studies in  
471 *P. berghei*<sup>43</sup> and *P. falciparum*,<sup>44</sup> suggesting an essential function. To directly test its functional  
472 essentiality in *P. falciparum*, we used CRISPR/Cas9<sup>56</sup> to tag the endogenous gene in Dd2 parasites  
473 to encode a C-terminal hemagglutinin (HA)-FLAG epitope fusion and the aptamer/TetR-DOZI  
474 system<sup>57</sup> that enables ligand-dependent regulation of protein expression using the non-toxic small  
475 molecule, anhydrotetracycline (aTc). In this system, normal protein expression occurs +aTc and  
476 translational repression is induced upon aTc washout (Figure 6A). Correct integration into the  
477 genomic locus with the expected genotype in both polyclonal and clonal parasites was confirmed  
478 by Southern blot (Figure 6- figure supplement 1). Expression of the ~60 kDa HA-FLAG-tagged,  
479 endogenous mature protein was detected by western blot (Figure 6B).

480 To test PPS essentiality for blood-stage parasite growth, we synchronized PPS knockdown  
481 (KD) parasites and monitored their growth  $\pm$ aTc over multiple intraerythrocytic lifecycles.  
482 Because of inconsistency in detecting the endogenous PPS by western blot (WB), possibly due to  
483 low protein expression, we monitored PPS transcript levels by RT-qPCR in lieu of WB analysis.  
484 We observed robust knockdown of PPS mRNA levels by the second intraerythrocytic cycle  
485 (Figure 6C). The fate of target mRNA in the aptamer/TetR-DOZI system has not been

486 characterized in depth. Our data is consistent with a prior report<sup>58</sup> and suggests that TetR-DOZI  
487 binding after aTc washout leads to mRNA transcript degradation, possibly within stress granules  
488 targeted by DOZI-bound transcripts.<sup>57</sup> In the presence of aTc, culture parasitemia expanded in a  
489 step-wise fashion over the ~10 days of the growth assay such that the culture needed to be split  
490 multiple times to avoid over-growth (Figure 6C). Without aTc, however, the culture grew normally  
491 over the first 3 intraerythrocytic cycles but showed a major growth defect in the fourth cycle  
492 consistent with extensive parasite death observed by blood smear (Figure 6C and Figure 6- figure  
493 supplements 1 and 2). Parasite growth under -aTc conditions was rescued in the presence of 200  
494  $\mu$ M exogenous IPP (Figure 6C), indicating an essential PPS function within the apicoplast.

495         To test a role for PPS in synthesizing polyprenyl PP groups, we attempted to rescue parasite  
496 growth in -aTc conditions by adding 5  $\mu$ M FOH, GGOH, or decaprenol. We observed that only  
497 decaprenol, but not FOH or GGOH, rescued parasite growth -aTc, and the magnitude of rescue by  
498 decaprenol was comparable to IPP (Figure 6C and Figure 6- figure supplement 2). These  
499 observations strongly suggest that PPS has an essential function downstream of IPP synthesis in  
500 converting isoprenoid precursors into longer-chain linear polyprenyl-PPs containing at least 5-10  
501 isoprene units.

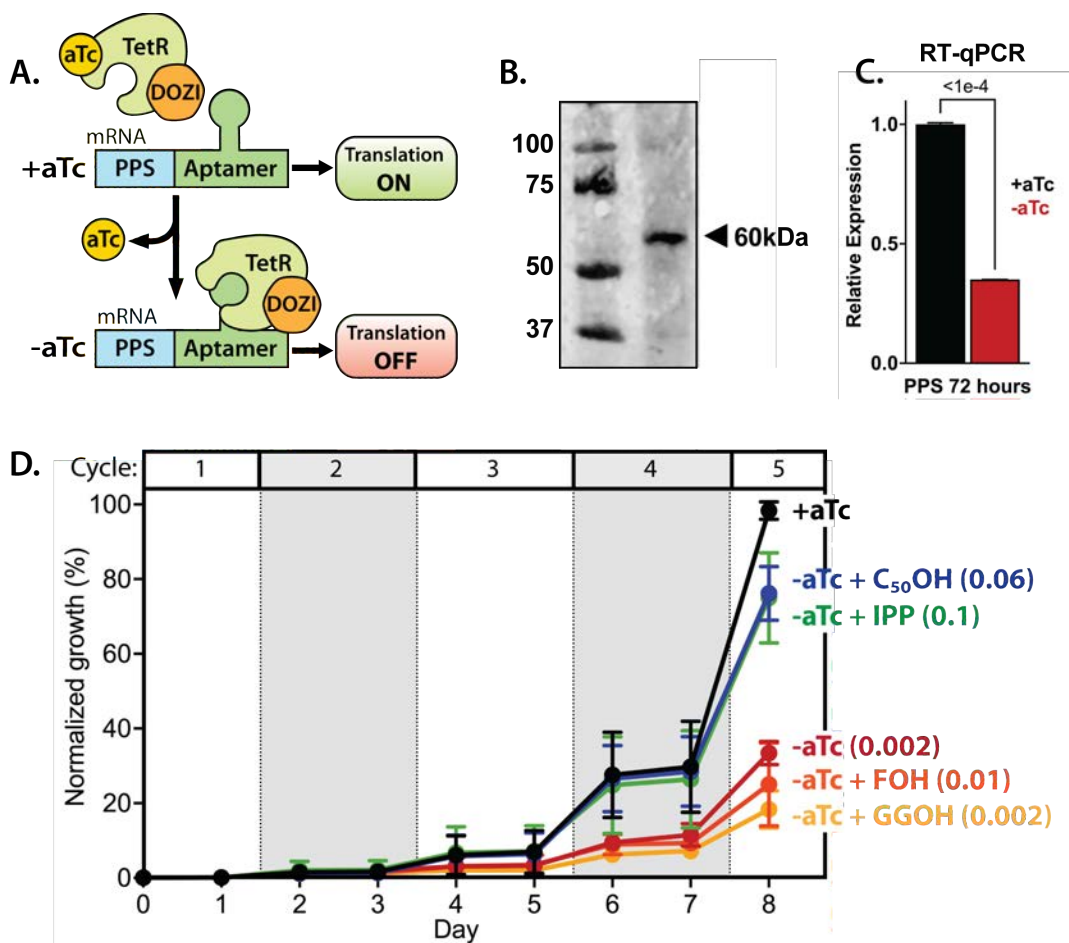

502  
 503  
 504 **Figure 6.** PPS (PF3D7\_0202700) is essential for parasite viability and apicoplast function. **(A)**  
 505 Schematic depiction of the aptamer/TetR-DOZI system for ligand-dependent protein expression.  
 506 The target protein (PPS) is translated normally in the presence of anhydrotetracycline (aTc) but its  
 507 translation is repressed without aTc. **(B)** Western blot of endogenously tagged PPS-HA/FLAG and  
 508 probed with anti-HA epitope antibody showing detection of tagged PPS at the expected size for  
 509 mature PPS of ~60 kDa. **(C)** RT-qPCR analysis of PPS transcript levels (normalized to the average  
 510 of two nuclear control genes) in synchronous parasites cultured for 72 hours ±aTc. Significance of  
 511 the observed difference was evaluated by two-tailed unpaired t-test with the indicated P value. **(D)**  
 512 Synchronous growth assay of Dd2 parasites tagged at the PPS locus with the aptamer/TetR-DOZI  
 513 system and grown ±aTc and ± 200 μM IPP or 5 μM farnesol (FOH), geranylgeraniol (GGOH), or  
 514 decaprenol (C<sub>50</sub>-OH). Parasitemia values for each condition are the average ±SD of two biological  
 515 replicates. Two-tailed unpaired t-test analysis was used to determine the significance of observed  
 516 parasitemia differences on day 8 for each condition compared to parasites cultured +aTc (P values  
 517 given in parentheses).

518 **Figure supplement 1.** Scheme for modification of the PPS genomic locus to integrate the  
 519 aptamer/TetR-DOZI system and Southern blot confirming correct integration.

520 **Figure supplement 2.** Blood-smear images of Dd2 parasites tagged at the PPS locus with the  
 521 aptamer/TetR-DOZI system and grown ±aTc for 8 days.

522



523

524           To test if PPS function is required for apicoplast biogenesis, we cultured PPS KD parasites  
525 in +aTc or -aTc/IPP conditions for 12 days and then assessed apicoplast morphology in fixed  
526 parasites by  $\alpha$ ACP immunofluorescence. We reasoned that IPP would rescue parasite viability  
527 upon PPS KD but not interfere with assessing any defect in apicoplast biogenesis if IPP synthesis  
528 is upstream of PPS function. Immunofluorescence analysis (IFA) revealed that ~30% of parasites  
529 cultured in -aTc conditions had a dispersed ACP signal indicative of apicoplast disruption (Figure  
530 7- figure supplement 1). Although this observation supports a critical role for PPS in apicoplast  
531 biogenesis, we wondered why PPS KD did not result in a higher fraction of parasites with disrupted  
532 apicoplast. We hypothesized that residual PPS expression resulting from incomplete KD combined  
533 with high IPP levels due to culture supplementation and endogenous MEP pathway activity might  
534 enable sufficient synthesis of polyprenols to attenuate the impact of PPS KD on apicoplast  
535 biogenesis.

536

537           To test this hypothesis and the contribution of MEP activity to the observed phenotype, we  
538 synchronized parasites to the ring stage and cultured them in  $\pm$ aTc conditions for 96 hours (two  
539 48-hour growth cycles) to knock down PPS expression before adding FOS and IPP at the start of  
540 the third growth cycle (Figure 7A). In this experiment, FOS was expected to inhibit endogenous  
541 MEP pathway activity without impacting apicoplast biogenesis since it was added concurrently  
542 with IPP, which fully rescues parasites from growth and apicoplast defects induced by FOS (Figure  
543 1).<sup>11, 21</sup> We first used IFA to assess apicoplast morphology in schizonts at the end of the third  
544 growth cycle (38 hours after adding FOS and IPP). We observed normal apicoplast elongation in  
545 +aTc parasites but focal, unbranched apicoplast morphology in the vast majority (>80%) of -aTc  
546 parasites (Figure 7, B and C, and Figure 7- figure supplement 2). Substitution of IPP with FOH or  
GGOH resulted in a nearly identical apicoplast elongation defect in -aTc parasites. In contrast,

547 substituting IPP with decaprenol resulted in normal apicoplast elongation in both +aTc and -aTc  
548 parasites (Figure 7, B and C, and Figure 7- figure supplement 2). The selective ability of  
549 decaprenol to rescue apicoplast-branching defects in -aTc conditions strongly supports an essential  
550 role for PPS in synthesizing long-chain polyprenyl isoprenoids required for apicoplast biogenesis.

551 To further test this conclusion, we maintained parasites in  $\pm$ aTc conditions with FOS and  
552 IPP for two additional growth cycles (total of five 48-hour cycles, Figure 7A). Parasites cultured  
553 +aTc displayed normal elongated apicoplast morphology. In contrast, the -aTc (+FOS and IPP)  
554 culture predominantly contained parasites with a dispersed ACP signal indicative of apicoplast  
555 loss (Figure 7, D and E, and Figure 7- figure supplement 3). These -aTc parasites also contained a  
556 strongly reduced qPCR signal for apicoplast genomic DNA, relative to +aTc parasites (Figure 7F).  
557 These results indicate that PPS is essential for apicoplast maintenance and inheritance by daughter  
558 parasites such that loss of PPS function (with IPP supplementation) results in parasite progeny  
559 lacking the intact organelle. This essential PPS function downstream of IPP synthesis by the MEP  
560 pathway is sufficient to explain our observation that blocking pathway activity by FOS or  $\Delta$ DXS  
561 (Figure 1) inhibits apicoplast biogenesis.



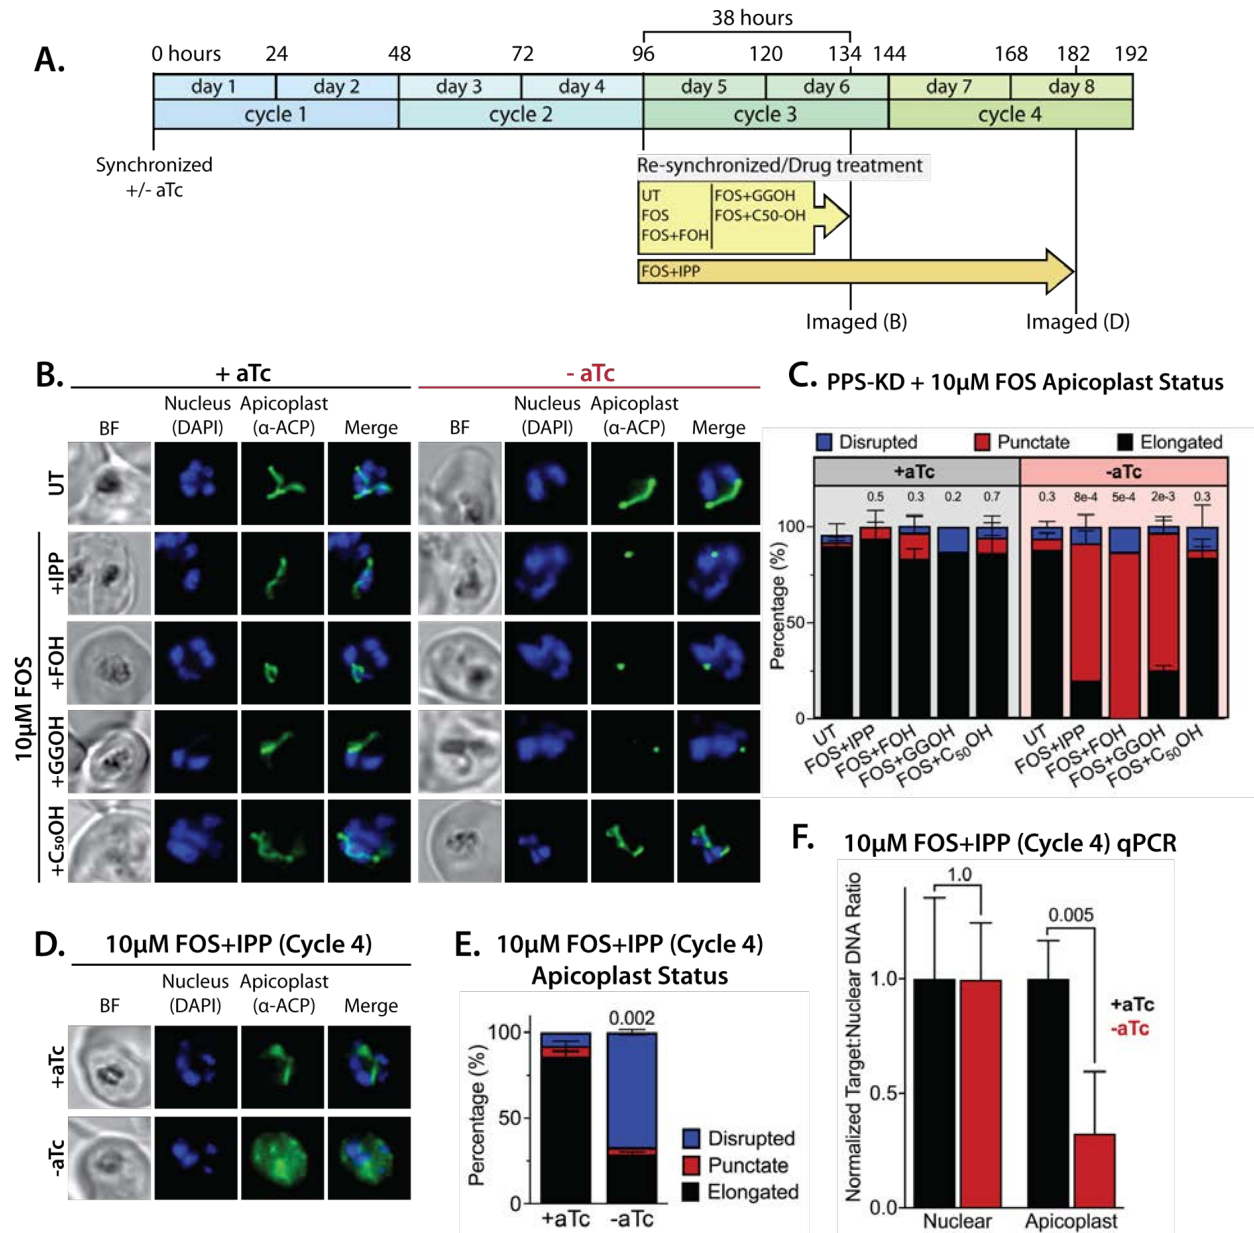

562

563 **Figure 7.** PPS is required for apicoplast biogenesis. (A) Scheme summarizing growth of  
 564 synchronized PPS knockdown parasites cultured ±aTc, re-synchronized and treated with 10 μM  
 565 FOS ±200 μM IPP or 5 μM farnesol (FOH), geranylgeraniol (GGOH), or decaprenol (C<sub>50</sub>-OH) at  
 566 96 hours after initial synchronization, and imaged at 134 and 182 hours after initial  
 567 synchronization. (B) Immunofluorescence analysis (IFA) of PPS knockdown parasites cultured as  
 568 described in panel A and imaged at 134 hours (day 6) after initial synchronization to assess  
 569 apicoplast morphology ±aTc. (C) Statistical analysis of apicoplast morphology for 50 total  
 570 parasites imaged for each condition in panel A from two independent experiments. Apicoplast  
 571 morphologies were scored as punctate (focal), elongated, or disrupted (dispersed); counted; and  
 572 plotted by histogram as the fractional population with the indicated morphology. Error bars  
 573 represent standard deviations from replicate experiments. Two-tailed unpaired t-test analysis was  
 574 used to determine the significance of observed population differences compared to untreated (UT)

575 parasites (P values given above each condition). **(D)** Immunofluorescence analysis of PPS  
576 knockdown parasites cultured as described in panel A and imaged at 182 hours (day 8) after initial  
577 synchronization to assess apicoplast morphology  $\pm$ aTc. **(E)** Statistical analysis of apicoplast  
578 morphology for 50 total parasites imaged for each condition in panel D and analyzed as in panel  
579 C. **(F)** Quantitative PCR analysis of the apicoplast:nuclear (Api:Nu) genome ratio for parasites  
580 cultured  $\pm$ aTc and imaged in panel D, based on amplification of apicoplast TufA  
581 (PF3D7\_API02900) or nuclear ADSL (PF3D7\_0206700) relative to nuclear ISP  
582 (PF3D7\_0802500) genes. Indicated qPCR ratios were normalized to +aTc in each case and are the  
583 average  $\pm$ SD of two biological replicates. Significance of  $\pm$ aTc differences was analyzed by two-  
584 tailed unpaired t-test to determine the stated P value. All parasite samples collected for IFA were  
585 imaged by brightfield (BF) and epifluorescence microscopy, with visualization of parasite nuclei  
586 by DAPI staining and apicoplast by an anti-apicoplast ACP antibody.

587  
588 **Figure supplement 1.** IFA images and analysis of apicoplast morphology in PPS knockdown  
589 parasites grown +aTc or -aTc/+IPP (200  $\mu$ M) for 12 days.

590 **Figure supplement 2.** Additional IFA images of PPS knockdown parasites treated as in Figure  
591 7B.

592 **Figure supplement 3.** Additional IFA images of PPS knockdown parasites treated as in Figure  
593 7D.

594  
595

596 **No evidence for PPS function in carotenoid synthesis.** Despite its strong sequence similarity to  
597 known polyprenyl synthases that catalyze the head-to-tail condensation of isoprenoid precursors,  
598 PF3D7\_0202700 has also been proposed to catalyze the biochemically distinct head-to-head  
599 condensation of 20-carbon GGPP groups into 40-carbon phytoene and thus function as a phytoene  
600 synthase (PSY) within a broader pathway of carotenoid biosynthesis proposed to exist in  
601 *Plasmodium* parasites (Figure 8A).<sup>53, 59</sup> Polyprenyl synthases and phytoene synthases are  
602 mechanistically distinct enzymes that lack significant sequence similarity but are thought to share  
603 a common isoprenoid-related protein fold that reflects their ancient divergence from a common  
604 ancestral enzyme.<sup>47, 60</sup> Given the mechanistic differences between head-to-tail and head-to-head  
605 condensation of isoprenoids (Figure 8A), which involve distinct positioning of substrate  
606 pyrophosphate groups within each active site, there is no known enzyme that is capable of  
607 catalyzing both reactions.<sup>60</sup> Thus, the proposal of dual PPS and PSY functions for PF3D7\_0202700

608 is without biochemical precedent. Nevertheless, we considered whether this protein might also  
609 have PSY function and evaluated whether existing observations supported or contradicted a  
610 proposed role for this protein in carotenoid biosynthesis.

611 As noted previously, untargeted sequence similarity searches via NCBI BLAST<sup>51</sup> and MPI  
612 HHpred<sup>52</sup> with PF3D7\_0202700 as the query sequence only identify polyprenyl synthase  
613 homologs from bacteria, algae, and plants (Figure 5- figure supplement 3) and fail to identify PSY  
614 homologs. Furthermore, targeted pairwise alignments show no evidence of significant sequence  
615 homology between PF3D7\_0202700 and confirmed eukaryotic or prokaryotic PSY sequences  
616 from *Arabidopsis thaliana* (Uniprot P37271, chloroplast-targeted)<sup>61</sup> or *Erwinia herbicola*  
617 (*Pantoea agglomerans*, Uniprot D5KXJ0),<sup>62</sup> respectively. Finally, the prior proposal of PSY  
618 activity by PF3D7\_0202700 was based in part on its sequence similarity to an annotated PSY from  
619 *Rubrivivax gelatinosus* bacteria (NCBI accession BAA94032) that also appeared to contain  
620 sequence features expected of a head-to-tail polyprenyl synthase.<sup>53</sup> We noted that the functional  
621 annotation of this bacterial protein was subsequently revised to a geranylgeranyl-PP synthase  
622 (Uniprot I0HUM5),<sup>63</sup> thus explaining its sequence similarity to PF3D7\_0202700 and the  
623 homology of both proteins to known polyprenyl synthases. On the basis of these sequence  
624 analyses, we considered it unlikely that PF3D7\_0202700 had dual activity as a PSY.

625 The prior work studied the antiparasitic effects of the squalene synthase inhibitor, zaragozic  
626 acid (ZA, also called squalestatin), that inhibited blood-stage *P. falciparum* growth (EC<sub>50</sub> ~5 μM)  
627 and was proposed to specifically target PF3D7\_0202700 based on observation of a ~6-fold  
628 increase in EC<sub>50</sub> for parasites episomally expressing a second copy of this protein.<sup>59</sup> We repeated  
629 these experiments in Dd2 parasites and observed a similar EC<sub>50</sub> of ~10 μM for ZA that increased  
630 5-fold to ~50 μM in Dd2 parasites episomally expressing PPS-RFP (Figure 8- figure supplement

631 1). However, in contrast to PPS knockdown (Figure 6D), lethal growth inhibition by ZA was not  
632 rescued by exogenous IPP (Figure 8- figure supplement 1) and did not affect apicoplast elongation  
633 (Figure 8- figure supplement 2). These contrasting phenotypes strongly suggest that PPS, and more  
634 broadly the apicoplast, are not uniquely targeted by ZA. The basis for why PPS over-expression  
635 reduces parasite sensitivity to ZA is unclear but may reflect drug interactions with broader  
636 isoprenoid metabolism outside the apicoplast that are rescued, directly or indirectly, by reaction  
637 products of PPS.

638  $\beta$ -carotene, a 40-carbon carotenoid derived from phytoene, was previously detected by  
639 mass spectrometry in extracts of *P. falciparum*-infected erythrocytes and suggested to be  
640 biosynthesized by parasites based on the lack of detection in extracts of uninfected erythrocytes.<sup>53</sup>  
641 Using our PPS knockdown line, we tested whether translational repression of PF3D7\_0202700  
642 impacted detectable levels of  $\beta$ -carotene in parasites, as predicted to occur if PPS also functioned  
643 as a PSY. After synchronization, PPS knockdown parasites were grown  $\pm$ aTc for 120 hours and  
644 harvested at the end of the third intraerythrocytic growth cycle, which immediately precedes the  
645 growth defect observed in Figure 6D. Saponin pellets of these parasites were extracted in acetone  
646 and analyzed by liquid chromatography/tandem mass spectrometry for  $\beta$ -carotene (Figure 8- figure  
647 supplement 3). We observed indistinguishable low levels of  $\beta$ -carotene in both samples (Figure  
648 8B), providing no evidence that PPS plays a role in carotenoid biosynthesis.

649 Although uninfected erythrocytes washed in AlbuMAX-free RPMI lacked detectable  $\beta$ -  
650 carotene, we observed that extracts of uninfected erythrocytes incubated in complete RPMI  
651 medium containing AlbuMAX I had  $\beta$ -carotene levels that were nearly identical to extracts of  
652 parasite-infected erythrocytes (Figure 8B). Analysis of AlbuMAX (ThermoFisher catalog  
653 #11020021) by mass spectrometry revealed modest levels of  $\beta$ -carotene (Figure 8- figure

654 supplement 4), consistent with the bovine origin of AlbuMAX (lipid-rich bovine serum albumin)  
655 and the plant-based diet of these animals expected to contain  $\beta$ -carotene. These results are  
656 sufficient to explain the presence of carotenoids like  $\beta$ -carotene in parasite extracts. In summary,  
657 we find no evidence that PPS function contributes to  $\beta$ -carotene levels in *P. falciparum*-infected  
658 erythrocytes, which we suggest non-specifically take up exogenous plant-derived  $\beta$ -carotene  
659 associated with AlbuMAX in the culture medium.

660 Parasite-infected erythrocytes were previously reported to incorporate  $^3\text{H}$ -labeled GGPP  
661 into biosynthetic products that had reverse-phase HPLC retention times similar to all-trans-lutein  
662 or  $\beta$ -carotene standards, suggesting de novo synthesis of these isoprenoid products.<sup>53</sup> Because the  
663 extracted products were radioactive, their identity could not be directly confirmed by tandem mass  
664 spectrometry. To directly test if blood-stage *P. falciparum* parasites incorporate isoprenoid  
665 precursors into  $\beta$ -carotene, as predicted for active biosynthesis, we cultured the PfMev parasites  
666 in 50  $\mu\text{M}$  of 2- $^{13}\text{C}$ -mevalonate in the presence of 10  $\mu\text{M}$  FOS. This strategy was chosen to inhibit  
667 MEP pathway activity, ensure full  $^{13}\text{C}$ -labeling of the endogenous IPP and DMAPP precursor pool  
668 produced by the cytoplasmic bypass enzymes, and result in a distinguishable 8 Da mass increase  
669 for any  $\beta$ -carotene derived from de novo synthesis. We previously showed that this strategy results  
670 in complete  $^{13}\text{C}$ -labeling of endogenous IPP and FPP.<sup>29</sup> Parasites were expanded to high  
671 parasitemia over several days under  $^{13}\text{C}$ -labeling conditions before extraction and analysis by mass  
672 spectrometry. Although we readily detected unlabeled  $\beta$ -carotene ( $m/z$  536.4), which we attribute  
673 to culture medium AlbuMAX, we were unable to detect  $^{13}\text{C}$ -labeled  $\beta$ -carotene ( $m/z$  544.4) (Figure  
674 8C). In contrast to the parasite analysis, we readily detected fully  $^{13}\text{C}$ -labeled  $\beta$ -carotene ( $m/z$   
675 576.6) produced by *E. coli* bacteria engineered to biosynthesize  $\beta$ -carotene<sup>64</sup> and grown in minimal  
676 M9 medium with uniformly labeled  $^{13}\text{C}$ -glucose as the sole carbon source (Figure 8D). In

677 summary, we find no evidence for PSY function by PF3D7\_0202700 or for de novo carotenoid  
 678 synthesis by blood-stage *P. falciparum* parasites. Collectively, our data strongly support the  
 679 conclusion that PF3D7\_0202700 functions exclusively as a polyprenyl synthase required for  
 680 apicoplast biogenesis.

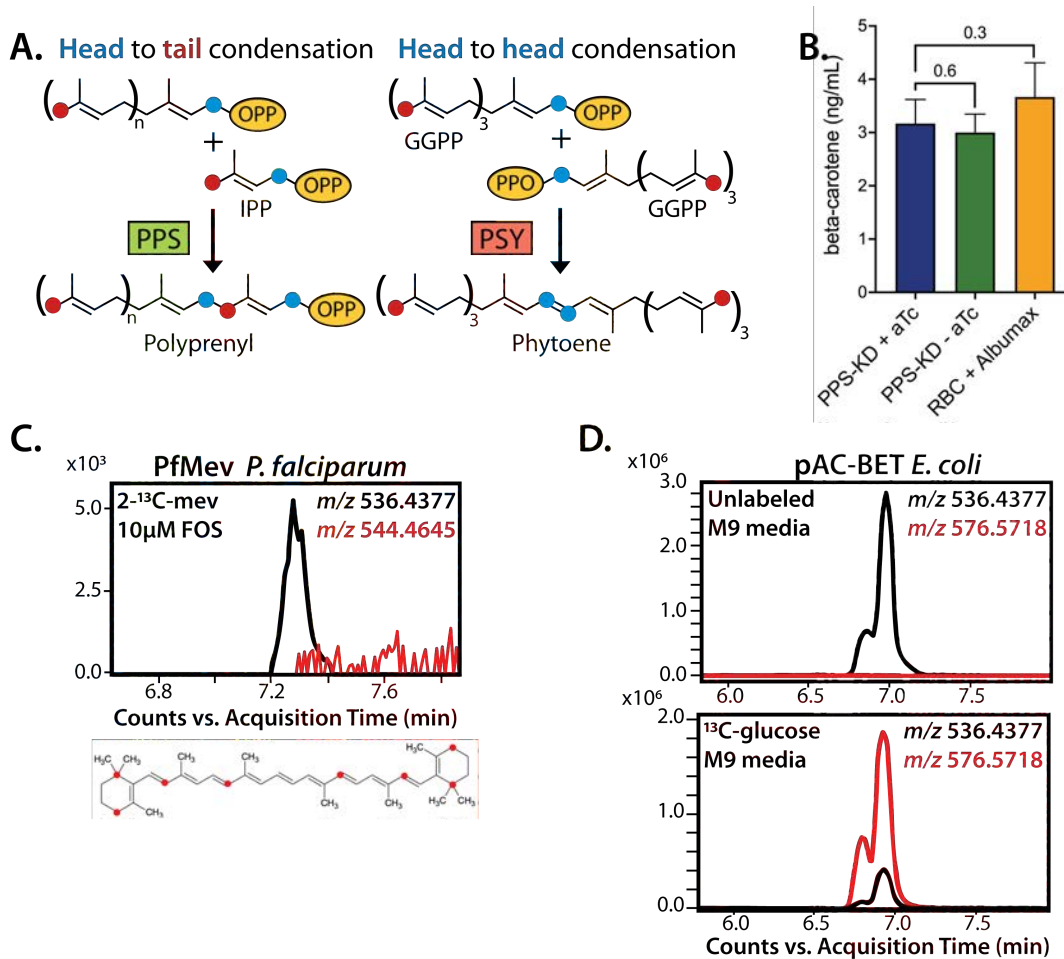

681  
 682  
 683 **Figure 8.** No evidence that PPS contributes to carotenoid synthesis by *P. falciparum*. (A)  
 684 Schematic depiction of head-to-tail arrangement of prenyl groups during polyprenyl-PP synthesis  
 685 versus head-to-head arrangement of geranylgeranyl-PP groups during phytoene synthesis. (B)  
 686 Mass spectrometry determination of unlabeled β-carotene levels in PPS knockdown parasites  
 687 grown for 6 days ±aTc or in uninfected red blood cells incubated in complete media containing  
 688 Albumax. Measured β-carotene levels are the average ±SD of 3 biological replicates, whose  
 689 differences were analyzed by two-tailed unpaired t-test for significance (P values given relative to  
 690 +aTc sample). (C) Intensity versus retention time plot for liquid chromatography-mass  
 691 spectrometry determination of unlabeled and <sup>13</sup>C-labeled β-carotene in NF54 PfMev parasites  
 692 cultured for 6 days in 50 μM 2-<sup>13</sup>C-mevalonate and 10 μM fosmidomycin. Below: schematic  
 693 depiction of the 8 carbon atoms in β-carotene expected to be labeled with <sup>13</sup>C for synthesis from



694 IPP derived from 2-<sup>13</sup>C-mevalonate in PfMev parasites. **(D)** Intensity versus retention time plot for  
695 liquid chromatography-mass spectrometry determination of unlabeled and <sup>13</sup>C-labeled β-carotene  
696 in pAC-BETAipi *E. coli* grown in unlabeled or fully <sup>13</sup>C-labeled glucose as the sole carbon source  
697 in M9 minimal media. The two peaks reflect the presence of an isomeric mix of all-trans and cis  
698 β-carotene produced by the pAC-BETAipi *E. coli*, as previously reported.<sup>64</sup>  
699

700 **Figure supplement 1.** 48-hour growth inhibition curves for treatment of Dd2 parasites with  
701 zaragozic acid without or with episomal expression of PPS-RFP or 200 μM IPP.

702 **Figure supplement 2.** Epifluorescence microscopy images of D10 parasites treated with 160 μM  
703 zaragozic acid as synchronized rings and imaged for ACP<sub>L</sub>-GFP and Hoescht 36 hours later as  
704 multinuclear schizonts.

705 **Figure supplement 3.** Fragment ion spectrum for unlabeled beta-carotene determined by tandem  
706 mass spectrometry of β-carotene commercial standard.

707 **Figure supplement 4.** Intensity versus retention time plot for liquid chromatography-mass  
708 spectrometry determination of unlabeled β-carotene in Albumax I.  
709

## 710 **DISCUSSION**

711 Biosynthesis of the isoprenoid precursors, IPP and DMAPP, is a well-established essential  
712 function of the *Plasmodium* apicoplast, but prior work has focused nearly exclusively on the  
713 critical roles of isoprenoids for diverse cellular processes outside this organelle.<sup>7, 11, 15, 20</sup> We have  
714 elucidated a novel arm of isoprenoid metabolism within the apicoplast that is required for  
715 biogenesis of this critical organelle (Figure 9). This discovery expands the paradigm for isoprenoid  
716 utilization by malaria parasites, uncovers a novel essential feature of apicoplast biology, and  
717 identifies a key enzyme in this pathway suitable for development as a therapeutic target.

718

719 **Implications for general understanding of apicoplast functions.** Our study, which was inspired  
720 by prior hints in the literature,<sup>25-27</sup> firmly establishes a novel essential role for MEP pathway  
721 activity in supporting apicoplast biogenesis, in addition to its recognized role producing IPP  
722 required outside this organelle. The dual roles of this pathway in both apicoplast-specific and  
723 broader parasite cellular biology provide a clear exception to the prevailing binary model of blood-

724 stage apicoplast metabolism that pathway functions in this organelle can be cleanly segregated into  
725 those required for organelle maintenance versus those producing an essential anabolic output.<sup>11, 13,</sup>  
726 <sup>15, 65</sup> Thus, IPP synthesis by the MEP pathway requires apicoplast maintenance, which in turn  
727 depends on IPP synthesis. The two processes are convoluted and interdependent.

728 Our results also support the emerging paradigm<sup>12, 16-18</sup> that inhibition of apicoplast  
729 maintenance pathways can kill parasites with first-cycle kinetics that defy the delayed-death  
730 phenotype commonly observed for translation-blocking antibiotics such as doxycycline that target  
731 organelle housekeeping.<sup>6, 12</sup> Indeed, blocking IPP synthesis causes same-cycle defects in apicoplast  
732 biogenesis, which are expected to produce non-viable parasite progeny independent of lethal  
733 dysfunctions in isoprenoid-dependent metabolism outside the organelle. Analysis of the timing of  
734 FOS-induced defects in apicoplast branching also provides an unexpected and incisive window  
735 into the differential compartmentalization of IPP essentiality in parasites. We observed that FOS-  
736 treated parasites display apicoplast-elongation defects in early schizogony but continue to divide  
737 nuclear DNA and transition into mature schizonts before stalling prior to segmentation (Figure  
738 1A). Thus, the critical role of IPP for apicoplast biogenesis precedes the broader cellular need for  
739 IPP outside the organelle in mature schizonts, suggested by recent works to predominantly reflect  
740 essential roles for IPP-dependent protein prenylation.<sup>15, 30</sup> Although MEP pathway activity begins  
741 in ring-stage parasites,<sup>31, 32</sup> we observed identical inhibition of apicoplast elongation in schizonts  
742 independent of whether FOS was added to rings concomitant with synchronization or to  
743 trophozoites 12 hours after synchronization (Figure 1A). This observation suggests that IPP  
744 utilization in the apicoplast depends on de novo synthesis rather than a pre-existing metabolite  
745 pool, possibly because IPP does not accumulate in the apicoplast and/or that IPP synthesis within  
746 the organelle is differentially partitioned for export and internal utilization.



747

748 **Why does apicoplast biogenesis depend on IPP synthesis?** The essential function of PPS in  
749 apicoplast maintenance is sufficient to explain the apicoplast reliance on IPP synthesis unveiled  
750 by FOS treatment of parasites. Although the dominant polyprenyl-PP product of apicoplast PPS  
751 in parasites remains uncertain, sequence features, prior in vitro enzymology, and the ability of  
752 exogenous decaprenol but not GGOH or FOH to rescue PPS knockdown indicate that linear  
753 polyprenyl-PP products longer than 4 and as long as 10 isoprene units are critical for apicoplast  
754 maintenance.<sup>24</sup> Prior work suggested a dual function for PF3D7\_0202700 as a phytoene synthase  
755 (PSY) that also condenses isoprenoid precursors,<sup>53, 59</sup> but we found no evidence to support this  
756 proposed PSY function or carotenoid biosynthesis more broadly. Synthesis of octaprenyl-PP by  
757 PF3D7\_0202700 was previously proposed to be critical for ubiquinone biosynthesis in the parasite  
758 mitochondrion.<sup>24</sup> Localization of this protein to the apicoplast (Figure 5) and observation that  
759 exogenous IPP rescues the growth defects of its knockdown (Figure 6D) strongly suggest that its  
760 activity is not required for mitochondrial ubiquinone biosynthesis and that its essential function is  
761 specific to the apicoplast.

762 Plant chloroplasts synthesize linear polyprenyl isoprenoids to serve a wide variety of  
763 functions that are only partially understood but include key roles in light harvesting and  
764 photosynthesis, oxidative stress protection, and as precursors of signaling and defense molecules  
765 that function outside the chloroplast (e.g., abscisic acid, gibberellins, and terpenes).<sup>66-68</sup> The  
766 *Plasmodium* apicoplast has lost photosynthesis capabilities and has uncertain carotenoid and  
767 terpene synthesis capacity. Volatile terpenes<sup>69</sup> and carotenoids<sup>53</sup> have been detected in *P.*  
768 *falciparum*-infected erythrocytes, but the parasite genome lacks enzyme homologs of the relevant  
769 synthases required for terpene and carotenoid biosynthesis.<sup>1, 7</sup> Furthermore, we found no evidence

770 of de novo  $\beta$ -carotene synthesis by parasites, and results herein as well as recent studies<sup>70, 71</sup>  
771 indicate that these metabolites can derive from erythrocyte and/or culture medium sources rather  
772 than parasite-specific synthesis. Thus, these known functions in chloroplasts seem uncertain or  
773 unlikely to explain apicoplast reliance on longer-chain polyprenyl synthase activity in malaria  
774 parasites. Longer-chain polyprenyl-PPs and related dolichols serve as membrane-bound glycan  
775 carriers for protein glycosylation, but these activities in *Plasmodium* appear to occur in the  
776 endoplasmic reticulum as they do in other organisms.<sup>20, 72, 73</sup>

777         Linear polyprenyl alcohols have been found to be important components of plant  
778 membranes, especially chloroplast membranes, where they are proposed to modulate membrane  
779 structure, fluidity, and dynamics.<sup>66, 68, 74, 75</sup> In the absence of other known roles for longer-chain  
780 polyprenyl-PPs in the apicoplast, we hypothesize that linear polyprenols or polyprenyl phosphates  
781 may serve as critical components of the apicoplast membranes and be required for maintaining  
782 membrane fluidity during organelle biogenesis (Figure 9). A prior mass spectrometry-based  
783 lipidomics study of isolated apicoplasts focused primarily on the fatty acid and phospholipid  
784 composition of this organelle and did not characterize isoprenoid components.<sup>76</sup> Selective isotopic  
785 labeling of parasite-synthesized isoprenoids by 2-<sup>13</sup>C-mevalonate in the PfMev line, combined  
786 with apicoplast isolation and our PPS knockdown line, can potentially identify specific apicoplast  
787 isoprenoids whose synthesis depends on PPS activity and thus clarify why apicoplast biogenesis  
788 requires longer-chain polyprenyl synthase activity.

789         Independent of its specific role in apicoplast biogenesis, PPS function is critical for parasite  
790 survival and thus constitutes a new essential arm of isoprenoid metabolism in the apicoplast  
791 suitable for development as a therapeutic target. BLAST analysis of the human genome using the  
792 PPS protein sequence as query reveals a variety of polyprenyl synthase homologs with modest 20-

793 30% sequence identity to 25-50% of the PPS sequence. The substantial sequence differences with  
 794 human orthologs will facilitate selective targeting of PPS by chemical inhibitors. Identification of  
 795 PPS as an apicoplast-targeted enzyme indicates that new metabolic pathways and functions remain  
 796 to be discovered and/or localized to the apicoplast. These novel functions, which are predicted to  
 797 be required for organelle maintenance, will enhance our understanding of fundamental apicoplast  
 798 biology and provide new candidate drug targets for antimalarial therapies.

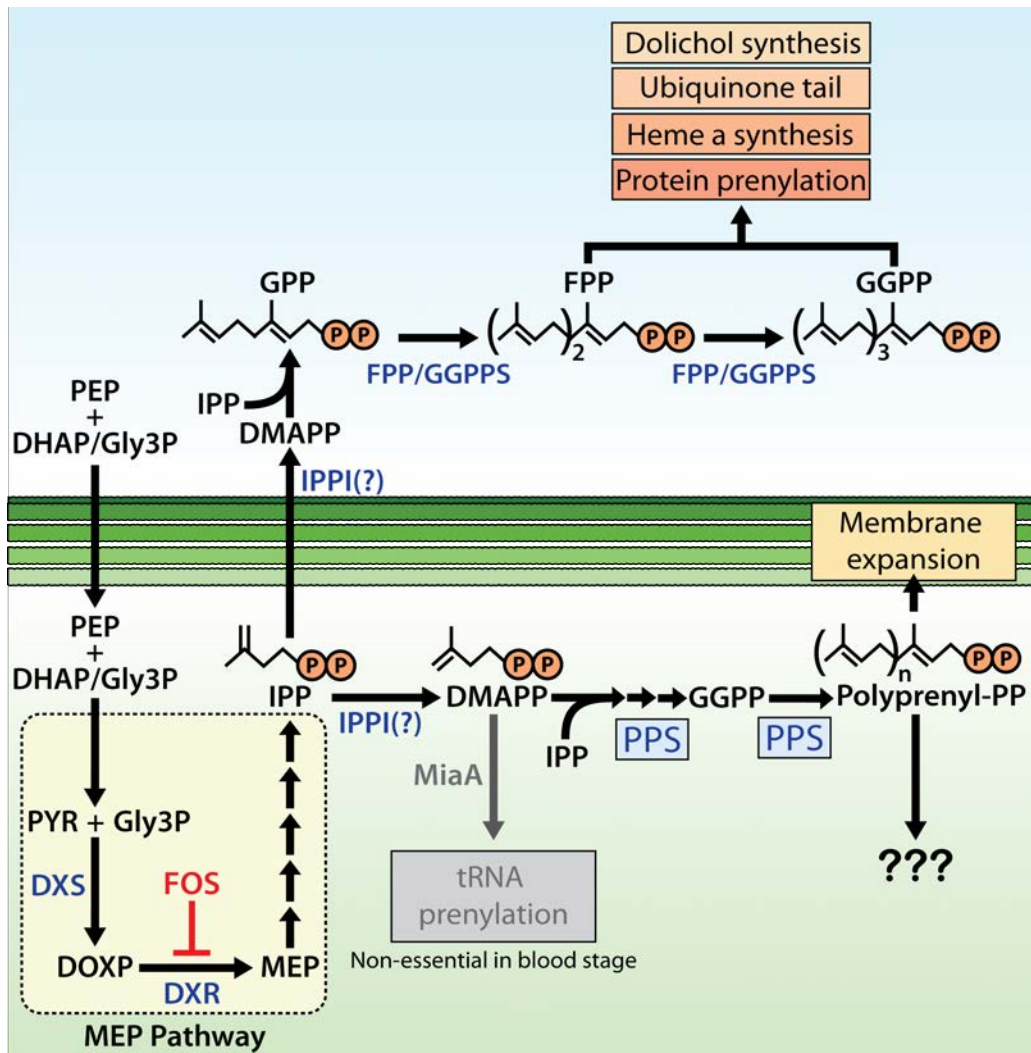

799  
 800 **Figure 9.** Schematic diagram of apicoplast isoprenoid metabolism in blood-stage *P. falciparum*  
 801 parasites. PK = pyruvate kinase II, TPI = triose phosphate isomerase, IPPI = IPP isomerase, PEP  
 802 = phosphoenolpyruvate, DHAP = dihydroxyacetone phosphate, PYR = pyruvate, Gly3P =  
 803 glyceraldehyde-3-phosphate. Question marks indicate uncertainty in the identity of the proposed  
 804 IPP isomerase and in the role of polyprenyl isoprenoid products of PPS in apicoplast biogenesis.  
 805

806 **MATERIALS AND METHODS**

807 **Materials:** All reagents were of the highest purity commercially available. The vendor and catalog  
808 number are given for individual compounds when first mentioned.

809

810 **Fluorescence Microscopy:** For live-cell experiments, parasite samples were collected at 38 hours  
811 after synchronization with 5% D-sorbitol (Sigma S7900). Parasite nuclei were visualized by  
812 incubating samples with 1-2  $\mu\text{g/ml}$  Hoechst 33342 (Thermo Scientific Pierce 62249) for 10-20  
813 minutes at room temperature. The parasite apicoplast was visualized in D10<sup>28</sup> or NF54  
814 mevalonate-bypass<sup>29</sup> cells using the ACPL-GFP expressed by both lines. The parasite  
815 mitochondrion was visualized by incubating parasites with 10 nM MitoTracker Red CMXRos  
816 (Invitrogen Life Technologies M7512) for 15 minutes prior to wash-out and imaging. For  
817 immunofluorescence assay (IFA) experiments, parasites were fixed, stained, and mounted as  
818 previously described.<sup>77</sup> For IFA images, the parasite apicoplast was visualized using a polyclonal  
819 rabbit anti-ACP antibody<sup>78</sup> and an anti-rabbit fluorescent 2° antibody, the nucleus was stained with  
820 ProLong Gold Antifade Mountant with DAPI (Invitrogen Life Technologies P36931), and PPS-  
821 GFP was visualized with a Goat anti-GFP antibody (Abcam ab5450). Images were taken on  
822 DIC/brightfield, DAPI, GFP, and RFP channels using either a Zeiss Axio Imager or an EVOS  
823 M5000 imaging system. Fiji/ImageJ was used to process and analyze images. All image  
824 adjustments, including contrast and brightness, were made on a linear scale.

825 For phenotypic analyses, apicoplast morphologies for each experimental condition were  
826 assessed for 25 parasites in each of two biological replicate experiments (50 parasites total per  
827 condition). Apicoplast morphologies were scored as elongated, focal, or dispersed; counted; and  
828 plotted by histogram as the fractional population with the indicated morphology. Statistical

829 significance of observed differences from untreated parasites was assessed in GraphPad Prism 9  
830 by two-tailed unpaired t test. P values were rounded to one significant figure, and non-significance  
831 was concluded for differences with P values >0.05.

832

833 **Inhibition and Rescue of Apicoplast Biogenesis:** ACP<sub>L</sub>-GFP D10 and NF54 PfMev parasites  
834 were synchronized with 5% (w/v) D-sorbitol for 10 minutes at room temperature and returned to  
835 culture in 10 μM fosmidomycin (Invitrogen Life Technologies F23103), 100 nM atovaquone  
836 (Caymen Chemicals 23802), 2 μM DSM1,<sup>79</sup> 6 μM blasticidin-S (Invitrogen Life Technologies  
837 R21001), 5 nM WR99210 (Jacobus Pharmaceuticals), 160 μM zaragozic acid/squalestatin  
838 (Caymen Chemicals 17452), or 2 μM MMV019313 (ChemDiv C498-0579). For FOS experiments,  
839 parasites were left in FOS only or supplemented with 5 μM farnesol (Sigma F203), 5 μM  
840 geranylgeraniol (Sigma G3278), 5 μM decaprenol (Isoprenoids polyprenol C50), 5 μM β-carotene  
841 (Sigma C9750), 50 μM DL-mevalonolactone (Cayman Chemicals 20348), or 200 μM IPP (NH<sub>4</sub><sup>+</sup>  
842 salt, Isoprenoids IPP001). All parasites were cultured for 36 hours after synchronization and then  
843 imaged by live-cell fluorescence microscopy to monitor apicoplast status. All concentrations  
844 reflect the final concentration in culture medium.

845

846 **Parasite synchronization:** Parasites were synchronized to the ring stage either by treatment with  
847 5% D-sorbitol (Sigma S7900) or by first magnet-purifying schizonts and then incubating them  
848 with uninfected erythrocytes for 5 hr followed by treatment with sorbitol. Results from growth  
849 assays and microscopy analyses using either of these synchronization methods were  
850 indistinguishable within error, and 5% sorbitol was used unless stated otherwise.

851

852 **Delayed Mevalonate-Rescue Assay:** NF54 PfMev parasites were synchronized with 5% (w/v)  
853 D-sorbitol for 10 minutes at room temperature and returned to culture in 10  $\mu$ M fosmidomycin. 50  
854  $\mu$ M DL-mevalonate was added to cultures immediately or after 30, 34, or 38 hours post  
855 synchronization. Parasitemia was measured by flow cytometry every 24 hours. After 60 hours  
856 post-synchronization, parasites from each mevalonate time point were cloned out by limiting  
857 dilution. Apicoplast status of all isolated clones was evaluated by live-cell ACP<sub>L</sub>-GFP  
858 fluorescence. ACP<sub>L</sub>-GFP signal was observed for the presence of distinct branching morphology  
859 (apicoplast intact) or the presence of scattered punctate signals throughout the cytosol (apicoplast  
860 disruption). A total of 9, 17, 18, and 5 clones from the 0, 30, 34, and 38-hour rescue time-points,  
861 respectively, were evaluated by microscopy (only 5 clones returned from the 38-hour rescue time  
862 point). Apicoplast (SufB: Pf3D7\_API04700) and nuclear (PPS: Pf3D7\_0202700) genome PCR  
863 (primers 4/5 and 1/2) and mevalonate-dependence growth assays were done on 2 clones from each  
864 time point to confirm apicoplast status.

865  
866 **Parasite Culturing and Transfection:** All experiments were performed using *Plasmodium*  
867 *falciparum* Dd2, ACP<sub>L</sub>-GFP D10<sup>28</sup>, or ACP<sub>L</sub>-GFP NF54 PfMev<sup>29</sup> parasite strains. Parasite  
868 culturing was performed in Roswell Park Memorial Institute medium (RPMI-1640, Thermo Fisher  
869 23400021) supplemented with 2.5 g/L Albumax I Lipid-Rich BSA (Thermo Fisher 11020039), 15  
870 mg/L hypoxanthine (Sigma H9636), 110 mg/L sodium pyruvate (Sigma P5280), 1.19 g/L HEPES  
871 (Sigma H4034), 2.52 g/L sodium bicarbonate (Sigma S5761), 2 g/L glucose (Sigma G7021), and  
872 10 mg/L gentamicin (Invitrogen Life Technologies 15750060). Cultures were generally  
873 maintained at 2% hematocrit in human erythrocytes obtained from the University of Utah Hospital  
874 blood bank, at 37 °C, and at 5% O<sub>2</sub>, 5% CO<sub>2</sub>, 90% N<sub>2</sub>. Parasite-infected erythrocytes were

875 transfected in 1X cytomix containing 50-100  $\mu$ g midi-prep DNA by electroporation in 0.2 cm  
876 cuvettes using a Bio-Rad Gene Pulser Xcell system (0.31 kV, 925  $\mu$ F). Transgenic parasites were  
877 selected on the basis of plasmid resistance cassettes encoding human DHFR<sup>36</sup>, yeast DHOD<sup>79</sup>, or  
878 blasticidin-S deaminase (BSD)<sup>35</sup> and cultured in 5 nM WR99210, 2  $\mu$ M DSM1, or 6  $\mu$ M  
879 blasticidin-S, respectively. Gene-edited Dd2 parasites that contained PPS (PF3D7\_0202700)  
880 tagged with the aptamer/TetR-DOZI cassette<sup>57</sup> were maintained in 0.5-1  $\mu$ M anhydrotetracycline  
881 (Caymen Chemicals 10009542). Genetically modified parasites were genotyped by PCR and/or  
882 Southern blot, as previously described.<sup>80</sup> For western blot and IFA studies of PPS-GFP in  
883 apicoplast-disrupted Dd2 parasites, transgenic parasites were cultured >7 days in 5 nM WR99210,  
884 1  $\mu$ M doxycycline (Sigma D9891), and 200  $\mu$ M IPP to induce stable apicoplast loss prior to  
885 parasite harvest.

886

887 **Parasite Growth Assays:** Parasite growth was monitored by diluting asynchronous or sorbitol-  
888 synchronized parasites to ~0.5% parasitemia and allowing culture expansion over several days  
889 with daily media changes. Parasitemia was monitored daily by flow cytometry by diluting 10  $\mu$ l  
890 of each parasite culture well from each of two to three biological replicate samples into 200  $\mu$ l of  
891 1.0  $\mu$ g/ml acridine orange (Invitrogen Life Technologies A3568) in phosphate buffered saline  
892 (PBS) and analysis on a BD FACSCelesta system monitoring SSC-A, FSC-A, PE-A, FITC-A, and  
893 PerCP-Cy5-5-A channels. Daily parasitemia measurements for asynchronous cultures were plotted  
894 as function of time and fit to an exponential growth equation using GraphPad Prism 9.0. For EC<sub>50</sub>  
895 determinations, synchronous ring-stage parasites were diluted to 1% parasitemia and incubated  
896 with variable drug concentrations for 48-72 hours without media changes. Parasitemia was  
897 determined by flow cytometry in biological duplicate samples for each drug concentration,



898 normalized to the parasitemia in the absence of drug, plotted as a function of the log of the drug  
899 concentration (in nM or  $\mu$ M), and fit to a 4-parameter dose-response model using GraphPad Prism  
900 9.0.

901

902 **Cloning and Episomal Expression of PPS:** The gene encoding PPS (PF3D7\_0202700) lacks  
903 introns and was cloned by PCR from Dd2 parasite genomic DNA using primers designed for  
904 insertion into the XhoI/AvrII sites of pTYEOE (yeast DHOD positive selection cassette)<sup>81</sup> and  
905 pTEOE (human DHFR positive selection cassette)<sup>55</sup> vectors in frame with C-terminal RFP and  
906 GFP tags, respectively. These vectors are designed to drive episomal protein expression using the  
907 HSP86 promoter and for co-transfection with plasmid pHTH that contains the piggyBac  
908 transposase<sup>82</sup> for integration into the parasite genome. A single forward primer was used for PPS  
909 cloning into both vectors (primer 1) while reverse primers were vector-specific (primers 2 and 3)  
910 Cloning was completed using ligation-independent cloning (QuantaBio RepliQa HiFi Assembly  
911 Mix). Cloning products were transformed into Top10 chemically competent cells, and bacterial  
912 clones were selected for carbenicillin (Sigma C3416) resistance. Correct plasmid sequence in  
913 isolated clonal bacteria was confirmed by both AscI/AatII (NEB) restriction digest and Sanger  
914 sequencing (University of Utah DNA Sequencing Core). 100  $\mu$ g of either purified PPS-RFP-  
915 TyEOE or PPS-GFP-TEOE in combination with 25  $\mu$ g of the pHTH transposase plasmid was  
916 transfected into Dd2 parasites by electroporation, as described above. Transfected parasites were  
917 allowed to expand in the absence of drug for 48 hours before selection with either 2  $\mu$ M DSM1 or  
918 5 nM WR99210 for PPS-RFP-TyEOE or PPS-GFP-TEOE respectively. Stable, drug-resistant  
919 parasites returned from transfection in 3-6 weeks.

920



921 **PPS Gene-Editing to Enable Ligand-Dependent Regulation of Protein Expression:**

922 Crispr/Cas9-stimulated repair by double-crossover homologous recombination was used to tag the  
923 PPS gene (PF3D7\_0202700) to encode a C-terminal hemagglutinin (HA)-FLAG epitope tag and  
924 the 3' 10X aptamer/TetR-DOZI system<sup>57</sup> to enable regulated PPS expression using  
925 anhydrotetracycline. Guide RNA sequences corresponding to TGATATAAAACAAAGTAGCG,  
926 CGTGCTAGTTCTATTTTTGC, and GATGATTCAAATAAAAGAAG (primers 6-11) were  
927 cloned into a modified version of the previously published pAIO vector,<sup>83</sup> in which the BtgZI site  
928 was replaced with a unique HindIII site to facilitate cloning (primers 12 and 13). To tag the PPS  
929 gene, a donor pMG75<sup>57</sup> repair plasmid was prepared by PCR-amplifying 635 bp of the 3' coding  
930 sequence and 679 bp of the 3' untranslated region (UTR) as homology flanks to the PPS gene,  
931 fusing these fragments together by PCR with an AflII site in between (679 bp 3' UTR-AflII-635  
932 bp 3' coding sequence), and inserting this fused fragment into the AscI and AatII sites of the  
933 pMG75 vector (primers 14-17). A shield mutation was introduced to the 3' end of the coding-  
934 sequence homology flank corresponding to the gRNA sequence  
935 TGATATAAAACAAAGTAGCG. This mutation (introduced using primer 18) ablated the  
936 CRISPR PAM sequence AGG that immediately following the gRNA sequence above by mutating  
937 it to AAG, resulting in a silent mutation of the Glu523 codon from GAG to GAA. Sanger  
938 sequencing confirmed the correct sequence of the homology flanks inserted into the pMG75  
939 vector. PCR analysis of the final pMG75 vector using primers 39-40 revealed that only 9 copies  
940 of the aptamer sequence were retained. Before transfection, the pMG74 vector was linearized by  
941 AflII digestion performed overnight at 37° C, followed by deactivation with Antarctic Phosphatase  
942 (NEB M0289S).

943 Dd2 parasites were transfected with 50 µg of pAIO Cas9/gRNA vector and 50 µg of the  
944 linearized pMG75 donor plasmid, as described above. Parasites were selected on the basis of the  
945 BSD resistance cassette encoded by the pMG75 plasmid and returned from transfection after 4-6  
946 weeks. Gene-edited Dd2 parasites resulting from transfection with pAIO Cas9/gRNA-4 (produced  
947 with primers 10/11) contained PPS (PF3D7\_0202700) tagged with the aptamer/TetR-DOZI  
948 cassette<sup>57</sup> and were maintained in 0.5-1 µM anhydrotetracycline (Caymen Chemicals 10009542).  
949 Genetically modified parasites were genotyped by Southern blot, as previously described.<sup>80</sup>  
950 Briefly, genomic DNA from the polyclonal parasites that returned from transfection was digested  
951 with BamHI and SpeI (New England Biolabs) and transferred to membrane (Nytran SuPerCharge)  
952 using the TurboBlotter system (VWR 89026-838). A DNA probe consisting of the 5' 750 bp of  
953 the PPS gene was produced by PCR (primers 16/17). Probe labeling, hybridization, and  
954 visualization was performed using the AlkPhos Direct Labeling and Detection System (VWR  
955 95038-288) and CDP-Star reagent (VWR 95038-292). The Southern blot confirmed complete  
956 integration into the PPS locus without evidence for unmodified parasites, and the polyclonal  
957 parasites were used for all subsequent experiments.

958

959 **Analysis of PPS transcript levels:** Cultures of PPS-aptamer/TetR-DOZI parasites were  
960 synchronized in 5% D-sorbitol and grown for 72 or 120 hours ±aTc prior to harvest. 4-ml cultures  
961 at approximately 10% were harvested by centrifugation (2000 rpm for 3 min.) and stored at -20 °C  
962 until use. Total RNA was isolated from frozen parasite-infected blood pellets using a modified  
963 Trizol (Invitrogen) extraction protocol. 5 mL Trizol (Invitrogen) was added to thawed pellets on  
964 ice, pipetted 20-30 times to resuspend, and pulse-vortexed 20 times for 15 s. 2 mL chloroform was  
965 added to each sample and vortexed, incubated on ice for 5 minutes, then spun for 10 minutes at 4C

966 at 5000rpm without brake. The top, aqueous layer (approximately 3 mL) was transferred to a new  
967 tube. 5 mL of isopropanol was added to each sample, gently mixed, and incubated at -80 °C for 20  
968 minutes or -20 °C overnight. Samples were spun at 5000 rpm for 30 min, washed with freshly-  
969 made solution of 70% ethanol, then spun again for 10 min. Ethanol was removed and pellets were  
970 dried 30 min on ice. RNA pellets were resuspended in RNase-free water, quantitated, and used  
971 immediately or stored at -80 °C. 1 µg of RNA was DNase-treated and reverse-transcribed using  
972 Superscript IV kit (Invitrogen) with the addition of gene-specific reverse primers 31-38.  
973 Subsequent cDNA was analyzed in duplicate through qPCR reactions with SYBR Green  
974 fluorescent probe (Invitrogen) in a Roche Lightcycler. Cp values for PPS (primers 35-36) were  
975 normalized to the average of 2 nuclear-encoded control genes (I5P, PF3D7\_0802500; ADSL,  
976 PF3D7\_0206700; primers 31-34), then used to calculate relative +aTc/-aTc RNA abundance for  
977 each of two biological replicates. Significance of the observed difference was evaluated by two-  
978 tailed unpaired t-test using GraphPad Prism 9.0.

979

980 **Synchronous Growth Assays of PPS Knockdown Parasites:** Dd2 parasites tagged at the  
981 genomic PPS locus with the aptamer/TetR-DOZI system were synchronized by 5% D-sorbitol to  
982 ring-stage parasites and allowed to expand ±aTc in two or three biological replicate samples.  
983 Parasitemia values were measured daily by flow cytometry and plotted as the average ±SD of  
984 replicate samples. For growth-rescue experiments, synchronous parasites were allowed to expand  
985 ±aTc, and -aTc plus 200 µM IPP, 5 µM farnesol (FOH), 5 µM geranylgeraniol (GGOH), or 5 µM  
986 decaprenol (C<sub>50</sub>-OH). For growth-rescue experiments involving fosmidomycin (FOS), PPS KD  
987 parasites were synchronized to rings with 5% D-sorbitol and grown for 4 days (96 hours) ±aTc.  
988 After 96 hours, all culture wells were synchronized again with 5% D-sorbitol and supplemented

989 with 10  $\mu$ M FOS and 200  $\mu$ M IPP, 5  $\mu$ M FOH, 5  $\mu$ M GGOH, or 5  $\mu$ M decaprenol. Parasites were  
990 cultured for another 38 hours before harvest at 134 total hours post-initial synchronization for IFA  
991 analysis of apicoplast morphology. Parasites grown  $\pm$ aTc with 10  $\mu$ M FOS and 200  $\mu$ M IPP were  
992 allowed to expand for an additional 48 hours and harvested at 182 hours post-initial  
993 synchronization for analysis by IFA and qPCR for apicoplast morphology and apicoplast:nuclear  
994 genome levels, respectively.

995

996 **qPCR Analysis of Apicoplast:Nuclear genomic DNA levels:** Genomic DNA was extracted from  
997 parasite samples grown  $\pm$ aTc with 10  $\mu$ M FOS and 200  $\mu$ M IPP and harvested at 182 hours post-  
998 initial synchronization. DNA extraction was performed using the QIAmp DNA Blood Mini Kit  
999 (Qiagen 51104). Primers for qPCR were designed to amplify a 120-140 bp region of an apicoplast  
1000 gene (TufA, PF3D7\_API02900, primers 35-36) and each of two nuclear genes (I5P,  
1001 PF3D7\_0802500; ADSL, PF3D7\_0206700; primers 31-34). Approximately 100 ng of DNA was  
1002 amplified in each of two biological replicates with PowerUp SYBR Green Master Mix  
1003 (ThermoFisher A25741) in a 96-well plate with 20  $\mu$ l reaction volume on a Quantstudio3 Real  
1004 Time PCR system. Specificity of primer amplification was confirmed for every sample by  
1005 identifying only one melting temperature for the product of each qPCR reaction. Abundance of  
1006 apicoplast relative to nuclear DNA was determined by comparative  $C_t$  analysis,<sup>84</sup> with  
1007 amplification of TufA (apicoplast) and I5P (nuclear) and calculation of  $2^{\Delta C_t}$ , where  $\Delta C_t = C_{t_{TufA}} -$   
1008  $C_{t_{I5P}}$ . As a positive control, abundance of a second nuclear gene (ADSL) relative to I5P was  
1009 calculated similarly. The  $2^{\Delta C_t}$  value for TufA or ADSL was normalized to +aTc for each gene to  
1010 determine a normalized target gene:control gene DNA abundance. Error bars represent the

1011 standard deviation between replicates, and P values were determined by two-tailed unpaired t-test  
1012 in GraphPad Prism 9.0.

1013

1014 **MiaA Gene Disruption:** The gene encoding MiaA (PF3D7\_1207600) was disrupted in the NF54  
1015 PfMev line using CRISPR/Cas9 and gene deletion by double-crossover homologous  
1016 recombination, similar to the recently described disruption of the DXPR gene (PF3D7\_1467300).<sup>29</sup>  
1017 Homology arm regions (411 bp for the 5' arm and 540 bp for the 3' arm) were PCR-amplified  
1018 from genomic DNA with primers 19-22 and cloned into the vector pRS<sup>29</sup> using ligation-  
1019 independent cloning (In-Fusion, Clontech). A guide RNA with sequence  
1020 AATAACGATATTAATGTAA was cloned into a modified pAIO vector called pCasG<sup>85</sup> using  
1021 primers 23 and 24. 75 µg of pRS-miaA-KO plasmid was combined with 75 µg of the pCasG guide  
1022 RNA plasmid and transfected into NF54 PfMev parasites. Transfected parasites were allowed to  
1023 expand for 48 hours in 50 µM mevalonate before selection with 5 nM WR99210 and 50 µM  
1024 mevalonate. Parasites returning from positive selection were genotyped by PCR using primers 25-  
1025 30. Asynchronous growth of  $\Delta$ MiaA PfMev parasites  $\pm$ Mev compared to parental PfMev parasites  
1026 was performed on biological duplicate samples. Average parasitemia values  $\pm$ SD were plotted  
1027 versus time and fit to an exponential growth equation in GraphPad Prism 9.0. Apicoplast (SufB:  
1028 PF3D7\_API04700) and nuclear (LDH: PF3D7\_1324900) genome PCR was performed to confirm  
1029 apicoplast status in parental PfMev and  $\Delta$ MiaA parasites, as previously reported.<sup>29</sup>

1030

1031 **Western Blots:** Samples of episomal PPS-GFP Dd2 or endogenously HA-FLAG-tagged PPS Dd2  
1032 parasites were harvested by centrifugation and treated with 0.05% saponin (Sigma 84510) in PBS  
1033 for 5 min at room temperature and spun down by centrifuge at 5,000 rpm for 30 minutes at 4°C.

1034 2% SDS was added to saponin pellets and resuspended by sonication. Parasites were incubated in  
1035 2% SDS overnight at 4°C. 5x Sample buffer containing beta-mercaptoethanol (BME) was added  
1036 to parasite samples before heating at 95°C for 5 minutes and centrifuging at 13,000 rpm for 5  
1037 minutes. Samples were fractionated by SDS-polyacrylamide gel electrophoresis (PAGE) using  
1038 10% acrylamide gels run at 120 V in the BIO-RAD mini-PROTEAN electrophoresis system.  
1039 Fractionated proteins were transferred from polyacrylamide gel to a nitrocellulose membrane at  
1040 100V for one hour using the BIO-RAD wet transfer system. Membranes were blocked in 1%  
1041 casein/PBS for one hour at room temperature and then probed with primary antibody overnight at  
1042 4°C and secondary antibody at room temperature for 1 hour. Episomal PPS-RFP parasite samples  
1043 were probed with 1:1000 mouse anti-RFP (Invitrogen Life Technologies MA5-15257) and  
1044 1:10,000 donkey anti-mouse DyLight800 (Invitrogen Life Technologies SA5-10172). Endogenous  
1045 HA-FLAG-tagged PPS parasite samples were probed with Roche rat anti-HA monoclonal 3F10  
1046 primary (Sigma 11867423001) and donkey-anti-rat DyLight800 (Invitrogen Life Technologies  
1047 SA5-10032) secondary antibodies.

1048

1049 **Sequence Similarity Analysis and Structural Homology Modeling:** Sequence similarity  
1050 searches for *P. falciparum* homologs to chicken FPPS (Uniprot P08836) were performed by  
1051 BLASTP analysis as implemented at the Plasmodium Genomics Resource webpage  
1052 ([www.plasmodb.org](http://www.plasmodb.org)). Sequence similarity searches using the PPS (PF3D7\_0202700) protein  
1053 sequence as query were carried out using NCBI BLAST<sup>51</sup> (excluding organisms in the phylum  
1054 Apicomplexa to which *P. falciparum* belongs) and MPI HHpred<sup>52</sup>. A homology model of PPS was  
1055 generated by the MPI HHpred software using the X-ray crystallographic structural model of *E.*

1056 *coli* OPPS (PDB 3WJK), which was one of the top 10 homology hits by HHpred analysis, as  
1057 template. Structural models were visualized using PyMol (Schrödinger).

1058

1059  **$\beta$ -Carotene Extraction and Analysis by Mass Spectrometry:** For determination of beta-  
1060 carotene levels in parasite-infected versus uninfected erythrocytes, 35 ml of 4% hematocrit *P.*  
1061 *falciparum* culture infected at 13-15% parasitemia with the Dd2 PPS aptamer/TetR-DOZI  
1062 knockdown parasites were collected after 6 days of growth in the presence or absence of 1  $\mu$ M  
1063 aTc. Uninfected erythrocyte samples were prepared by collecting 20 ml of 4% hematocrit  
1064 uninfected culture incubated for 6 days in RPMI media that lacked or contained 2.5 g/L AlbuMAX.  
1065 Samples of infected or uninfected erythrocytes were harvested by centrifugation, lysed by 0.05%  
1066 saponin, and pelleted by centrifugation. Saponin pellets were washed in PBS and then extracted  
1067 three times in 1 ml of chilled acetone (pellet was briefly sonicated after addition of the first acetone  
1068 volume). The supernatant of each extraction was pooled and dried down by vacuum concentration  
1069 (Speed Vac). Three biological replicates of each sample were prepared. For analysis of AlbuMAX,  
1070 85 mg of dry AlbuMAX (equivalent to the AlbuMAX content in 35 ml of complete culture media)  
1071 was extracted in 3 volumes of cold acetone, and supernatants were combined and dried as above.

1072 For analysis of  $\beta$ -carotene synthesis, NF54 PfMev parasites were cultured and expanded  
1073 over three intraerythrocytic cycles in media containing 50  $\mu$ M 2- $^{13}$ C-mevalonate and 10  $\mu$ M  
1074 fosmidomycin. This strategy was chosen to inhibit MEP pathway activity, ensure full  $^{13}$ C-labeling  
1075 of the endogenous IPP and DMAPP precursor pool within parasites produced by the cytoplasmic  
1076 bypass enzymes, and result in a distinguishable 8 Da mass increase for any  $\beta$ -carotene derived  
1077 from de novo synthesis. Final parasite samples contained 70 ml of culture at 15% parasitemia and



1078 were collected by centrifugation prior to 0.05 % saponin lysis, centrifugation, and washing the  
1079 pellet in PBS. The final pellet was extracted in acetone and dried, as described above.

1080 As a positive control for detecting isotopic incorporation of  $^{13}\text{C}$ -labeled precursors into  
1081 biosynthesized  $\beta$ -carotene, we turned to studies of *E. coli* bacteria engineered to biosynthesize  $\beta$ -  
1082 carotene<sup>64</sup> and grown in minimal M9 medium with uniformly labeled  $^{13}\text{C}$ -glucose as the sole  
1083 carbon source. Growth of bacteria in these conditions was expected to lead to a 40-Da mass  
1084 increase in detected  $\beta$ -carotene. 5-ml cultures of pAC-BETAipi *E. coli* or untransformed Top10  
1085 *E. coli* were allowed to expand over two days at 30° C in the dark. Bacterial cultures were harvested  
1086 by centrifugation at 5,000 rpm for 10 min., and bacterial pellets were extracted three times in cold  
1087 acetone and dried, as described above.

1088 LC-MS-grade methanol, acetonitrile, isopropyl alcohol, chloroform, and formic acid were  
1089 purchased from VWR. Samples were resuspended in 50  $\mu\text{l}$  MeOH/ $\text{CHCl}_3$  (2mM LiI), and a sample  
1090 volume of 10  $\mu\text{l}$  was injected onto a Phenomenex Luna 150 x 2.1 mm reverse-phase C8 column  
1091 maintained at 30 °C and connected to an Agilent HiP 1290 Sampler, Agilent 1290 Infinity pump,  
1092 and Agilent 6545 Accurate Mass Q-TOF dual AJS-ESI mass spectrometer. The instrument was  
1093 operated in positive ion mode, and the source gas temperature was 275 °C with a drying gas flow  
1094 of 12 L/min, nebulizer pressure of 35 psig, sheath gas temp of 325 °C and sheath gas flow of 12  
1095 L/min. VCap voltage was set at 3500 V, nozzle voltage 250 V, fragmentor at 90 V, skimmer at 65  
1096 V, octopole RF peak at 750 V and a scan range  $m/z$  40 - 900. The mobile solvent phase A was  $\text{H}_2\text{O}$   
1097 with 0.1% formic acid, and mobile phase B was MeOH:ACN:IPA (2:2:1 v/v) with 0.1% formic  
1098 acid. The chromatography gradient started at 80% mobile phase B then increased to 100% B over  
1099 6 min where it was held until 9.9 min and then returned to the initial conditions and equilibrated  
1100 for 5 min. The column flow rate was 0.5 mL/min.

1101 Results from LC-MS experiments were collected using Agilent Mass Hunter (MH)  
 1102 Workstation and analyzed using the software packages MH Qual and MH Quant (Agilent  
 1103 Technologies, Inc.). Unlabeled, 2-<sup>13</sup>C-mevalonate-labeled, and uniform <sup>13</sup>C-glucose-labeled β-  
 1104 carotene were analyzed using the molecular ions of *m/z* 536.4377, *m/z* 544.4645, and *m/z*  
 1105 576.5718, respectively. Fragmentation profiling of unlabeled β-carotene by MS/MS confirmed the  
 1106 expected product ions at *m/z* 444 and *m/z* 119, as previously reported.<sup>86</sup> For quantitation of  
 1107 unlabeled β-carotene levels in experimental samples and determination of a limit of detection  
 1108 (LOD), a calibration curve was constructed using serial dilutions of commercial β-carotene (Sigma  
 1109 C9750). The concentration LOD for a 10-μl sample of unlabeled β-carotene in this assay was 2.6  
 1110 ng/mL. Integrated peak areas for unlabeled β-carotene in experimental samples were converted to  
 1111 concentration values in the 10-μL sample using this calibration curve.

| Primers used in this study |                  |                                                                                                |
|----------------------------|------------------|------------------------------------------------------------------------------------------------|
| No.                        | Name             | Sequence (5' to 3')                                                                            |
| 1                          | PPS-EOE-F        | ACACGATTTTTCTCGAGATGGTTCACCTAAGTAAAAGAAATAATATTTAAAGCTTTTTA                                    |
| 2                          | PPS-GFP-TEOE-R   | TGCTGCACCTGGCCTAGGTTTGACGTTTCTTGATAACACGTTAAGATTAAATTAATTA                                     |
| 3                          | PPS-RFP-TyEOE-R  | TCAATTAAGTTTCTAGGTTTGACGTTTCTTGATAACACGTTAAGATTAAATTAATTA                                      |
| 4                          | SufB-F           | ACGATTTTTCTCGAGATGATAAAATTAATAAATTTTTTAAATATTTATAATTTAAATTA                                    |
| 5                          | SufB-R           | TAGACACCATCCTAGGATTAATATATCTTTAATTTTTAATGAAAATAATATAGGTATCT                                    |
| 6                          | PPS-Cas9gRNA1-F  | TAAGTATATAATATTCGTGCTAGTTCATTTTTGCGTTTTAGAGCTAGAA                                              |
| 7                          | PPS-Cas9gRNA1-R  | TTCTAGCTCTAAAACGCAAAAATAGAACTAGCACGAATATTATATACTTA                                             |
| 8                          | PPS-Cas9gRNA2-F  | TAAGTATATAATATTGATGATTCAAATAAAAAGAAGTTTTAGAGCTAGAA                                             |
| 9                          | PPS-Cas9gRNA2-R  | TTCTAGCTCTAAAACCTTCTTTTATTGAATCATCAATATTATATACTTA                                              |
| 10                         | PPS-Cas9gRNA4-F  | TAAGTATATAATATTGATATAAAAACAAGTAGCGTTTTAGAGCTAGAA                                               |
| 11                         | PPS-Cas9gRNA4-R  | TTCTAGCTCTAAAACCGCTACTTTGTTTTATATCAAATATTATATACTTA                                             |
| 12                         | Cas9HindIII-F    | AATATTAAGCTTGTTTTAGAGCTAGAAATAGCAAGTTAAAATAAGGCTAGTCCGTTATCA                                   |
| 13                         | Cas9HindIII-R    | TAAAACAAGCTTAATATTATATACTTAATATGAAATATGTGCATATAGGAAAAATTATGCA<br>TTTTGGTTACTCTAATATTATATATATAT |
| 14                         | PPS_3'UTR_HF-F   | GGCCCTTTCCGGGCGCGCCCAATAACATATACAATATCAAACATATATATTATAATATTA<br>TTAAACATCTCAATATTGTATTATTTAA   |
| 15                         | PPS_3'UTR_HF-R   | TAATGCTATGACACCTTCTTTTATTGACTTAAGTATGTTTGATACATGTAGATTTCTTA<br>AAGAATGAAGCTTA                  |
| 16                         | PPS_3'CR_HF-F    | TTTAAGAAATCTACATGTATCAAACATACTTAAGTCAAATAAAAAGAAGAGGTGTCATAGC                                  |
| 17                         | PPS_3'CR_HF-R    | GTCATAAGGATAGACGTCATCATTTGACGTTTCTTGATAACACG                                                   |
| 18                         | PPS_3'CR_HF-SM-R | CATAAGGATAGACGCTTTGACGTTTCTTGATAACACGTTAAGATTAAATTAATTAATGC<br>TTCGCTACTTGTGTTTTATATCATCATGTT  |
| 19                         | miaA.HA1.F       | GCCACGAGCGGCCGTAATAAAGACAACGGGCTGTCAAC                                                         |
| 20                         | miaA.HA1.R       | AAGCGCAGCGGCCGGAATTTCCATCTCTAAAAAAGTTCA                                                        |
| 21                         | miaA.HA2.F       | CGACAGACGCGGTGAAAAGAAATGATGATATGGTAGAATT                                                       |
| 22                         | miaA.HA2.R       | GGCCACCAGCGGCGATATCCATCTCTTTGTTTCTTGGC                                                         |
| 23                         | miaA.gRNA.F      | TAAGTATATAATATTAATAACGATATTAATGTAAGTTTTAGAGCTAGAA                                              |
| 24                         | miaA.gRNA.R      | TTCTAGCTCTAAAACCTTACATTTAATATCGTTATTAATATTATATACTTA                                            |

|    |             |                                                   |
|----|-------------|---------------------------------------------------|
| 25 | miaA.5.F    | GTTGAATAAATAAATGCCTCTCTATATATTGTAAACAT            |
| 26 | miaA.5.WT.R | CTTCGACTTTAGCAATACCTACATTG                        |
| 27 | miaA.3.F    | GGGAATCAGTAATTGATATAAGAAAAGAAG                    |
| 28 | miaA.3.WT.R | AAACTTCAAGACAATGCCTATAGC                          |
| 29 | pRS.F       | CATATTTATTAATCTAGAATTCGACAGACGCCGG                |
| 30 | pRS.R       | TACAAAATGCTTAAGCGCAGCGGCC                         |
| 31 | I5P-qPCR-F  | GACATAAGTTTAGTAGGTCG                              |
| 32 | I5P-qPCR-R  | TTCTGACTCCACATCATTG                               |
| 33 | ADSL-qPCR-F | GGAAATCCATAGACAAACAATG                            |
| 34 | ADSL-qPCR-R | TCCTGTGAGAAGTGCTCCAC                              |
| 35 | TufA-qPCR-F | AAGATGTATTTTCTATAACAGGTAGAGGTA                    |
| 36 | TufA-qPCR-R | AACTGTTGTTAAATTAGGAGATGATTTTC                     |
| 37 | PPS-qPCR-F  | ATCAGGGGATTATCTTTAGCAC                            |
| 38 | PPS-qPCR-R  | AACTTTGACAACATAAGAGAAACT                          |
| 39 | 3' APT-F    | CTTATGACGTACCTGATTATGCAC                          |
| 40 | 10x APT-R   | GTAGACCCCATTTGTGAGTACATAAATATATTATATAAACTAGACTAGG |

1112

1113

1114 **ACKNOWLEDGEMENTS:** We thank Belén Cassera, James Cox, Dale Poulter and  
1115 members of the Sigala lab for helpful discussions. Research reported in this publication was  
1116 supported by Department of Defense PRMRP Discovery Award W81XWH1810060 (to PAS),  
1117 National Institutes of Health grants R35GM133764 (to PAS) and AI125534 (to STP), a Burroughs  
1118 Wellcome Fund Career Award at the Scientific Interface (to PAS), the Johns Hopkins Malaria  
1119 Research Institute (STP), and the Bloomberg Family Foundation (STP). PAS is a Pew Scholar in  
1120 the Biomedical Sciences, supported by The Pew Charitable Trusts. MO and KR were supported in  
1121 part by NIH training grants T32DK007115 and T32AI007417, respectively. Metabolomics  
1122 analyses were supported in part by NIH grant U54DK110858. DNA synthesis and sequencing,  
1123 epifluorescence microscopy, mass spectrometry metabolomics, generation of CRISPR/Cas9  
1124 reagents, and flow cytometry were performed using core facilities at the University of Utah. Mass  
1125 spectrometry equipment was obtained through NCRN Shared Instrumentation Grants  
1126 1S10OD016232-01, 1S10OD018210-01A1 and 1S10OD021505-01.

1127

## 1128 REFERENCES

- 1129 [1] Ralph, S. A., van Dooren, G. G., Waller, R. F., Crawford, M. J., Fraunholz, M. J., Foth, B. J.,  
1130 Tonkin, C. J., Roos, D. S., and McFadden, G. I. (2004) Metabolic maps and functions of  
1131 the Plasmodium falciparum apicoplast, *Nat. Rev. Microbiol.* 2, 203-216.
- 1132 [2] Ke, H., Sigala, P. A., Miura, K., Morrissey, J. M., Mather, M. W., Crowley, J. R., Henderson,  
1133 J. P., Goldberg, D. E., Long, C. A., and Vaidya, A. B. (2014) The heme biosynthesis  
1134 pathway is essential for Plasmodium falciparum development in mosquito stage but not  
1135 in blood stages, *J. Biol. Chem.* 289, 34827-34837. DOI:  
1136 <https://doi.org/10.1074/jbc.M114.615831>
- 1137 [3] Goldberg, D. E., and Sigala, P. A. (2017) Plasmodium heme biosynthesis: To be or not to be  
1138 essential?, *PLoS Pathog.* 13, e1006511. DOI:  
1139 <https://doi.org/10.1371/journal.ppat.1006511>
- 1140 [4] Yu, M., Kumar, T. R. S., Nkrumah, L. J., Coppi, A., Retzlaff, S., Li, C. D., Kelly, B. J.,  
1141 Moura, P. A., Lakshmanan, V., Freundlich, J. S., Valderramos, J. C., Vilcheze, C.,  
1142 Siedner, M., Tsai, J. H. C., Falkard, B., Sidhu, A. B. S., Purcell, L. A., Gratraud, P.,  
1143 Kremer, L., Waters, A. P., Schiehsler, G., Jacobus, D. P., Janse, C. J., Ager, A., Jacobs,  
1144 W. R., Sacchetti, J. C., Heussler, V., Sinni, P., and Fidock, D. A. (2008) The Fatty Acid  
1145 Biosynthesis Enzyme FabI Plays a Key Role in the Development of Liver-Stage Malarial  
1146 Parasites, *Cell Host Microbe* 4, 567-578. DOI:  
1147 <https://doi.org/10.1016/J.Chom.2008.11.001>
- 1148 [5] Shears, M. J., Botte, C. Y., and McFadden, G. I. (2015) Fatty acid metabolism in the  
1149 Plasmodium apicoplast: Drugs, doubts and knockouts, *Mol. Biochem. Parasitol.* 199, 34-  
1150 50. DOI: <https://doi.org/10.1016/j.molbiopara.2015.03.004>
- 1151 [6] Dahl, E. L., and Rosenthal, P. J. (2007) Multiple antibiotics exert delayed effects against the  
1152 Plasmodium falciparum apicoplast, *Antimicrob. Agents Chemother.* 51, 3485-3490. DOI:  
1153 <https://doi.org/10.1128/AAC.00527-07>
- 1154 [7] Guggisberg, A. M., Amthor, R. E., and Odom, A. R. (2014) Isoprenoid biosynthesis in  
1155 Plasmodium falciparum, *Eukaryot. Cell* 13, 1348-1359. DOI:  
1156 <https://doi.org/10.1128/EC.00160-14>
- 1157 [8] Jomaa, H., Wiesner, J., Sanderbrand, S., Altincicek, B., Weidemeyer, C., Hintz, M.,  
1158 Turbachova, I., Eberl, M., Zeidler, J., Lichtenthaler, H. K., Soldati, D., and Beck, E.  
1159 (1999) Inhibitors of the nonmevalonate pathway of isoprenoid biosynthesis as  
1160 antimalarial drugs, *Science* 285, 1573-1576. DOI:  
1161 <https://doi.org/10.1126/science.285.5433.1573>
- 1162 [9] van Dooren, G. G., Stimmler, L. M., and McFadden, G. I. (2006) Metabolic maps and  
1163 functions of the Plasmodium mitochondrion, *FEMS Microbiol. Rev.* 30, 596-630. DOI:  
1164 <https://doi.org/10.1111/j.1574-6976.2006.00027.x>
- 1165 [10] Simao-Gurge, R. M., Wunderlich, G., Cricco, J. A., Cubillos, E. F. G., Domenech-Carbo,  
1166 A., Cebrian-Torrejon, G., Almeida, F. G., Cirulli, B. A., and Katzin, A. M. (2019)  
1167 Biosynthesis of heme O in intraerythrocytic stages of Plasmodium falciparum and  
1168 potential inhibitors of this pathway, *Sci. Rep.* 9, 19261. DOI:  
1169 <https://doi.org/10.1038/s41598-019-55506-y>
- 1170 [11] Yeh, E., and DeRisi, J. L. (2011) Chemical rescue of malaria parasites lacking an apicoplast  
1171 defines organelle function in blood-stage Plasmodium falciparum, *PLoS Biol.* 9,  
1172 e1001138. DOI: <https://doi.org/10.1371/journal.pbio.1001138>

- 1173 [12] Uddin, T., McFadden, G. I., and Goodman, C. D. (2018) Validation of Putative Apicoplast-  
1174 Targeting Drugs Using a Chemical Supplementation Assay in Cultured Human Malaria  
1175 Parasites, *Antimicrob. Agents Chemother.* 62. DOI: [https://doi.org/10.1128/AAC.01161-](https://doi.org/10.1128/AAC.01161-17)  
1176 [17](https://doi.org/10.1128/AAC.01161-17)
- 1177 [13] Ramya, T. N., Mishra, S., Karmodiya, K., Surolia, N., and Surolia, A. (2007) Inhibitors of  
1178 nonhousekeeping functions of the apicoplast defy delayed death in Plasmodium  
1179 falciparum, *Antimicrob. Agents Chemother.* 51, 307-316. DOI:  
1180 <https://doi.org/10.1128/AAC.00808-06>
- 1181 [14] Kennedy, K., Crisafulli, E. M., and Ralph, S. A. (2019) Delayed Death by Plastid Inhibition  
1182 in Apicomplexan Parasites, *Trends Parasitol.* 35, 747-759. DOI:  
1183 <https://doi.org/10.1016/j.pt.2019.07.010>
- 1184 [15] Kennedy, K., Cobbold, S. A., Hanssen, E., Birnbaum, J., Spillman, N. J., McHugh, E.,  
1185 Brown, H., Tilley, L., Spielmann, T., McConville, M. J., and Ralph, S. A. (2019) Delayed  
1186 death in the malaria parasite Plasmodium falciparum is caused by disruption of  
1187 prenylation-dependent intracellular trafficking, *PLoS Biol.* 17, e3000376. DOI:  
1188 <https://doi.org/10.1371/journal.pbio.3000376>
- 1189 [16] Amberg-Johnson, K., Hari, S. B., Ganesan, S. M., Lorenzi, H. A., Sauer, R. T., Niles, J. C.,  
1190 and Yeh, E. (2017) Small molecule inhibition of apicomplexan FtsH1 disrupts plastid  
1191 biogenesis in human pathogens, *Elife* 6. DOI: <https://doi.org/10.7554/eLife.29865>
- 1192 [17] Boucher, M. J., and Yeh, E. (2019) Disruption of Apicoplast Biogenesis by Chemical  
1193 Stabilization of an Imported Protein Evades the Delayed-Death Phenotype in Malaria  
1194 Parasites, *mSphere* 4. DOI: <https://doi.org/10.1128/mSphere.00710-18>
- 1195 [18] Okada, M., Guo, P., Nalder, S. A., and Sigala, P. A. (2020) Doxycycline has distinct  
1196 apicoplast-specific mechanisms of antimalarial activity, *Elife* 9. DOI:  
1197 <https://doi.org/10.7554/eLife.60246>
- 1198 [19] Gisselberg, J. E., Herrera, Z., Orchard, L. M., Llinas, M., and Yeh, E. (2018) Specific  
1199 Inhibition of the Bifunctional Farnesyl/Geranylgeranyl Diphosphate Synthase in Malaria  
1200 Parasites via a New Small-Molecule Binding Site, *Cell Chem. Biol.* 25, 185-193 e185.  
1201 DOI: <https://doi.org/10.1016/j.chembiol.2017.11.010>
- 1202 [20] Imlay, L., and Odom, A. R. (2014) Isoprenoid metabolism in apicomplexan parasites, *Curr.*  
1203 *Clin. Microbiol. Rep.* 1, 37-50. DOI: <https://doi.org/10.1007/s40588-014-0006-7>
- 1204 [21] Gisselberg, J. E., Dellibovi-Ragheb, T. A., Matthews, K. A., Bosch, G., and Prigge, S. T.  
1205 (2013) The suf iron-sulfur cluster synthesis pathway is required for apicoplast  
1206 maintenance in malaria parasites, *PLoS Pathog.* 9, e1003655. DOI:  
1207 <https://doi.org/10.1371/journal.ppat.1003655>
- 1208 [22] Gabriel, H. B., de Azevedo, M. F., Palmisano, G., Wunderlich, G., Kimura, E. A., Katzin,  
1209 A. M., and Alves, J. M. (2015) Single-target high-throughput transcription analyses  
1210 reveal high levels of alternative splicing present in the FPPS/GGPPS from Plasmodium  
1211 falciparum, *Sci. Rep.* 5, 18429. DOI: <https://doi.org/10.1038/srep18429>
- 1212 [23] No, J. H., de Macedo Dossin, F., Zhang, Y., Liu, Y. L., Zhu, W., Feng, X., Yoo, J. A., Lee,  
1213 E., Wang, K., Hui, R., Freitas-Junior, L. H., and Oldfield, E. (2012) Lipophilic analogs of  
1214 zoledronate and risidronate inhibit Plasmodium geranylgeranyl diphosphate synthase  
1215 (GGPPS) and exhibit potent antimalarial activity, *Proc. Natl. Acad. Sci. U. S. A.* 109,  
1216 4058-4063. DOI: <https://doi.org/10.1073/pnas.1118215109>
- 1217 [24] Tonhosolo, R., D'Alexandri, F. L., Genta, F. A., Wunderlich, G., Gozzo, F. C., Eberlin, M.  
1218 N., Peres, V. J., Kimura, E. A., and Katzin, A. M. (2005) Identification, molecular



- 1219 cloning and functional characterization of an octaprenyl pyrophosphate synthase in intra-  
1220 erythrocytic stages of *Plasmodium falciparum*, *Biochem. J.* 392, 117-126. DOI:  
1221 <https://doi.org/10.1042/BJ20050441>
- [25] Nair, S. C., Brooks, C. F., Goodman, C. D., Sturm, A., McFadden, G. I., Sundriyal, S.,  
1222 Anglin, J. L., Song, Y., Moreno, S. N., and Striepen, B. (2011) Apicoplast isoprenoid  
1223 precursor synthesis and the molecular basis of fosmidomycin resistance in *Toxoplasma*  
1224 *gondii*, *J. Exp. Med.* 208, 1547-1559. DOI: <https://doi.org/10.1084/jem.20110039>
- [26] Bowman, J. D., Merino, E. F., Brooks, C. F., Striepen, B., Carlier, P. R., and Cassera, M. B.  
1226 (2014) Antiapicoplast and gametocytocidal screening to identify the mechanisms of  
1227 action of compounds within the malaria box, *Antimicrob. Agents Chemother.* 58, 811-  
1228 819. DOI: <https://doi.org/10.1128/AAC.01500-13>
- [27] Goodman, C. D., and McFadden, G. I. (2014) Ycf93 (Orf105), a small apicoplast-encoded  
1230 membrane protein in the relict plastid of the malaria parasite *Plasmodium falciparum* that  
1231 is conserved in Apicomplexa, *PLoS One* 9, e91178. DOI:  
1232 <https://doi.org/10.1371/journal.pone.0091178>
- [28] Waller, R. F., Reed, M. B., Cowman, A. F., and McFadden, G. I. (2000) Protein trafficking  
1234 to the plastid of *Plasmodium falciparum* is via the secretory pathway, *EMBO J.* 19, 1794-  
1235 1802.
- [29] Swift, R. P., Rajaram, K., Liu, H. B., Dziedzic, A., Jedlicka, A. E., Roberts, A. D.,  
1237 Matthews, K. A., Jhun, H., Bumpus, N. N., Tewari, S. G., Wallqvist, A., and Prigge, S. T.  
1238 (2020) A mevalonate bypass system facilitates elucidation of plastid biology in malaria  
1239 parasites, *PLoS Pathog.* 16, e1008316. DOI:  
1240 <https://doi.org/10.1371/journal.ppat.1008316>
- [30] Howe, R., Kelly, M., Jimah, J., Hodge, D., and Odom, A. R. (2013) Isoprenoid biosynthesis  
1242 inhibition disrupts Rab5 localization and food vacuolar integrity in *Plasmodium*  
1243 *falciparum*, *Eukaryot. Cell* 12, 215-223. DOI: <https://doi.org/10.1128/EC.00073-12>
- [31] Zhang, B., Watts, K. M., Hodge, D., Kemp, L. M., Hunstad, D. A., Hicks, L. M., and Odom,  
1245 A. R. (2011) A second target of the antimalarial and antibacterial agent fosmidomycin  
1246 revealed by cellular metabolic profiling, *Biochemistry* 50, 3570-3577. DOI:  
1247 <https://doi.org/10.1021/bi200113y>
- [32] Cassera, M. B., Gozzo, F. C., D'Alexandri, F. L., Merino, E. F., del Portillo, H. A., Peres, V.  
1249 J., Almeida, I. C., Eberlin, M. N., Wunderlich, G., Wiesner, J., Jomaa, H., Kimura, E. A.,  
1250 and Katzin, A. M. (2004) The methylerythritol phosphate pathway is functionally active  
1251 in all intraerythrocytic stages of *Plasmodium falciparum*, *J. Biol. Chem.* 279, 51749-  
1252 51759. DOI: <https://doi.org/10.1074/jbc.M408360200>
- [33] Phillips, M. A., Gujjar, R., Malmquist, N. A., White, J., El Mazouni, F., Baldwin, J., and  
1254 Rathod, P. K. (2008) Triazolopyrimidine-based dihydroorotate dehydrogenase inhibitors  
1255 with potent and selective activity against the malaria parasite *Plasmodium falciparum*, *J.*  
1256 *Med. Chem.* 51, 3649-3653. DOI: <https://doi.org/10.1021/jm8001026>
- [34] Fry, M., and Pudney, M. (1992) Site of action of the antimalarial hydroxynaphthoquinone,  
1258 2-[trans-4-(4'-chlorophenyl) cyclohexyl]-3-hydroxy-1,4-naphthoquinone (566C80),  
1259 *Biochem. Pharmacol.* 43, 1545-1553. DOI: [https://doi.org/10.1016/0006-2952\(92\)90213-3](https://doi.org/10.1016/0006-2952(92)90213-3)
- [35] Mamoun, C. B., Gluzman, I. Y., Goyard, S., Beverley, S. M., and Goldberg, D. E. (1999) A  
1262 set of independent selectable markers for transfection of the human malaria parasite  
1263

- 1264 Plasmodium falciparum, *Proc. Natl. Acad. Sci. U. S. A.* 96, 8716-8720. DOI:  
1265 <https://doi.org/10.1073/pnas.96.15.8716>
- 1266 [36] Fidock, D. A., and Wellem, T. E. (1997) Transformation with human dihydrofolate  
1267 reductase renders malaria parasites insensitive to WR99210 but does not affect the  
1268 intrinsic activity of proguanil, *Proc. Natl. Acad. Sci. U. S. A.* 94, 10931-10936. DOI:  
1269 <https://doi.org/10.1073/pnas.94.20.10931>
- 1270 [37] Swift, R. P., Rajaram, K., Keutcha, C., Liu, H. B., Kwan, B., Dziedzic, A., Jedlicka, A. E.,  
1271 and Prigge, S. T. (2020) The NTP generating activity of pyruvate kinase II is critical for  
1272 apicoplast maintenance in Plasmodium falciparum, *Elife* 9. DOI:  
1273 <https://doi.org/10.7554/eLife.50807>
- 1274 [38] Dahl, E. L., Shock, J. L., Shenai, B. R., Gut, J., DeRisi, J. L., and Rosenthal, P. J. (2006)  
1275 Tetracyclines specifically target the apicoplast of the malaria parasite Plasmodium  
1276 falciparum, *Antimicrob. Agents Chemother.* 50, 3124-3131. DOI:  
1277 <https://doi.org/10.1128/AAC.00394-06>
- 1278 [39] van Dooren, G. G., Marti, M., Tonkin, C. J., Stimmer, L. M., Cowman, A. F., and  
1279 McFadden, G. I. (2005) Development of the endoplasmic reticulum, mitochondrion and  
1280 apicoplast during the asexual life cycle of Plasmodium falciparum, *Mol. Microbiol.* 57,  
1281 405-419. DOI: <https://doi.org/10.1111/j.1365-2958.2005.04699.x>
- 1282 [40] Persson, B. C., Esberg, B., Olafsson, O., and Bjork, G. R. (1994) Synthesis and function of  
1283 isopentenyl adenosine derivatives in tRNA, *Biochimie* 76, 1152-1160. DOI:  
1284 [https://doi.org/10.1016/0300-9084\(94\)90044-2](https://doi.org/10.1016/0300-9084(94)90044-2)
- 1285 [41] Esberg, B., Leung, H. C., Tsui, H. C., Bjork, G. R., and Winkler, M. E. (1999) Identification  
1286 of the miaB gene, involved in methylthiolation of isopentenylated A37 derivatives in the  
1287 tRNA of Salmonella typhimurium and Escherichia coli, *J. Bacteriol.* 181, 7256-7265.  
1288 DOI: <https://doi.org/10.1128/JB.181.23.7256-7265.1999>
- 1289 [42] Boucher, M. J., Ghosh, S., Zhang, L., Lal, A., Jang, S. W., Ju, A., Zhang, S., Wang, X.,  
1290 Ralph, S. A., Zou, J., Elias, J. E., and Yeh, E. (2018) Integrative proteomics and  
1291 bioinformatic prediction enable a high-confidence apicoplast proteome in malaria  
1292 parasites, *PLoS Biol.* 16, e2005895. DOI: <https://doi.org/10.1371/journal.pbio.2005895>
- 1293 [43] Bushell, E., Gomes, A. R., Sanderson, T., Anar, B., Girling, G., Herd, C., Metcalf, T.,  
1294 Modrzynska, K., Schwach, F., Martin, R. E., Mather, M. W., McFadden, G. I., Parts, L.,  
1295 Rutledge, G. G., Vaidya, A. B., Wengelnik, K., Rayner, J. C., and Billker, O. (2017)  
1296 Functional Profiling of a Plasmodium Genome Reveals an Abundance of Essential  
1297 Genes, *Cell* 170, 260-272 e268. DOI: <https://doi.org/10.1016/j.cell.2017.06.030>
- 1298 [44] Zhang, M., Wang, C., Otto, T. D., Oberstaller, J., Liao, X., Adapa, S. R., Udenze, K.,  
1299 Bronner, I. F., Casandra, D., Mayho, M., Brown, J., Li, S., Swanson, J., Rayner, J. C.,  
1300 Jiang, R. H. Y., and Adams, J. H. (2018) Uncovering the essential genes of the human  
1301 malaria parasite Plasmodium falciparum by saturation mutagenesis, *Science* 360. DOI:  
1302 <https://doi.org/10.1126/science.aap7847>
- 1303 [45] Kellogg, B. A., and Poulter, C. D. (1997) Chain elongation in the isoprenoid biosynthetic  
1304 pathway, *Curr. Opin. Chem. Biol.* 1, 570-578. DOI: [https://doi.org/10.1016/s1367-5931\(97\)80054-3](https://doi.org/10.1016/s1367-5931(97)80054-3)
- 1305  
1306 [46] Poulter, C. D. (2006) Farnesyl diphosphate synthase. A paradigm for understanding  
1307 structure and functional relationships in E-polyprenyl diphosphate synthases, *Phytochem.*  
1308 *Rev.* 5, 17-26. DOI: <https://doi.org/10.1007/s11101-005-4887-1>



- 1309 [47] Thulasiram, H. V., and Poulter, C. D. (2006) Farnesyl diphosphate synthase: The art of  
1310 compromise between substrate selectivity and stereoselectivity, *J. Am. Chem. Soc.* 128,  
1311 15819-15823. DOI: <https://doi.org/10.1021/ja065573b>
- 1312 [48] Tarshis, L. C., Proteau, P. J., Kellogg, B. A., Sacchettini, J. C., and Poulter, C. D. (1996)  
1313 Regulation of product chain length by isoprenyl diphosphate synthases, *Proc. Natl. Acad.*  
1314 *Sci. U. S. A.* 93, 15018-15023. DOI: <https://doi.org/10.1073/pnas.93.26.15018>
- 1315 [49] Jordao, F. M., Gabriel, H. B., Alves, J. M., Angeli, C. B., Bifano, T. D., Breda, A., de  
1316 Azevedo, M. F., Basso, L. A., Wunderlich, G., Kimura, E. A., and Katzin, A. M. (2013)  
1317 Cloning and characterization of bifunctional enzyme farnesyl diphosphate/geranylgeranyl  
1318 diphosphate synthase from *Plasmodium falciparum*, *Malar. J.* 12, 184. DOI:  
1319 <https://doi.org/10.1186/1475-2875-12-184>
- 1320 [50] Artz, J. D., Wernimont, A. K., Dunford, J. E., Schapira, M., Dong, A., Zhao, Y., Lew, J.,  
1321 Russell, R. G., Ebetino, F. H., Oppermann, U., and Hui, R. (2011) Molecular  
1322 characterization of a novel geranylgeranyl pyrophosphate synthase from *Plasmodium*  
1323 parasites, *J. Biol. Chem.* 286, 3315-3322. DOI: <https://doi.org/10.1074/jbc.M109.027235>
- 1324 [51] Boratyn, G. M., Camacho, C., Cooper, P. S., Coulouris, G., Fong, A., Ma, N., Madden, T.  
1325 L., Matten, W. T., McGinnis, S. D., Merezhuk, Y., Raytselis, Y., Sayers, E. W., Tao, T.,  
1326 Ye, J., and Zaretskaya, I. (2013) BLAST: a more efficient report with usability  
1327 improvements, *Nucleic Acids Res.* 41, W29-33. DOI: <https://doi.org/10.1093/nar/gkt282>
- 1328 [52] Zimmermann, L., Stephens, A., Nam, S. Z., Rau, D., Kubler, J., Lozajic, M., Gabler, F.,  
1329 Soding, J., Lupas, A. N., and Alva, V. (2018) A Completely Reimplemented MPI  
1330 Bioinformatics Toolkit with a New HHpred Server at its Core, *J. Mol. Biol.* 430, 2237-  
1331 2243. DOI: <https://doi.org/10.1016/j.jmb.2017.12.007>
- 1332 [53] Tonhosolo, R., D'Alexandri, F. L., de Rosso, V. V., Gazarini, M. L., Matsumura, M. Y.,  
1333 Peres, V. J., Merino, E. F., Carlton, J. M., Wunderlich, G., Mercadante, A. Z., Kimura, E.  
1334 A., and Katzin, A. M. (2009) Carotenoid biosynthesis in intraerythrocytic stages of  
1335 *Plasmodium falciparum*, *J. Biol. Chem.* 284, 9974-9985. DOI:  
1336 <https://doi.org/10.1074/jbc.M807464200>
- 1337 [54] Foth, B. J., Ralph, S. A., Tonkin, C. J., Struck, N. S., Fraunholz, M., Roos, D. S., Cowman,  
1338 A. F., and McFadden, G. I. (2003) Dissecting apicoplast targeting in the malaria parasite  
1339 *Plasmodium falciparum*, *Science* 299, 705-708.
- 1340 [55] Sigala, P. A., Crowley, J. R., Henderson, J. P., and Goldberg, D. E. (2015) Deconvoluting  
1341 heme biosynthesis to target blood-stage malaria parasites, *Elife* 4. DOI:  
1342 <https://doi.org/10.7554/eLife.09143>
- 1343 [56] Ghorbal, M., Gorman, M., Macpherson, C. R., Martins, R. M., Scherf, A., and Lopez-Rubio,  
1344 J. J. (2014) Genome editing in the human malaria parasite *Plasmodium falciparum* using  
1345 the CRISPR-Cas9 system, *Nat. Biotechnol.* 32, 819-821. DOI:  
1346 <https://doi.org/10.1038/nbt.2925>
- 1347 [57] Ganesan, S. M., Falla, A., Goldfless, S. J., Nasamu, A. S., and Niles, J. C. (2016) Synthetic  
1348 RNA-protein modules integrated with native translation mechanisms to control gene  
1349 expression in malaria parasites, *Nat. Commun.* 7, 10727. DOI:  
1350 <https://doi.org/10.1038/ncomms10727>
- 1351 [58] Maruthi, M., Ling, L., Zhou, J., and Ke, H. (2020) Dispensable Role of Mitochondrial  
1352 Fission Protein 1 (Fis1) in the Erythrocytic Development of *Plasmodium falciparum*,  
1353 *mSphere* 5. DOI: <https://doi.org/10.1128/mSphere.00579-20>

- 1354 [59] Gabriel, H. B., Silva, M. F., Kimura, E. A., Wunderlich, G., Katzin, A. M., and Azevedo,  
1355 M. F. (2015) Squalestatin is an inhibitor of carotenoid biosynthesis in *Plasmodium*  
1356 *falciparum*, *Antimicrob. Agents Chemother.* *59*, 3180-3188. DOI:  
1357 <https://doi.org/10.1128/AAC.04500-14>
- 1358 [60] Bouvier, F., Rahier, A., and Camara, B. (2005) Biogenesis, molecular regulation and  
1359 function of plant isoprenoids, *Prog. Lipid Res.* *44*, 357-429. DOI:  
1360 <https://doi.org/10.1016/j.plipres.2005.09.003>
- 1361 [61] Zhou, X., Welsch, R., Yang, Y., Alvarez, D., Riediger, M., Yuan, H., Fish, T., Liu, J.,  
1362 Thannhauser, T. W., and Li, L. (2015) Arabidopsis OR proteins are the major  
1363 posttranscriptional regulators of phytoene synthase in controlling carotenoid biosynthesis,  
1364 *Proc. Natl. Acad. Sci. U. S. A.* *112*, 3558-3563. DOI:  
1365 <https://doi.org/10.1073/pnas.1420831112>
- 1366 [62] Iwata-Reuyl, D., Math, S. K., Desai, S. B., and Poulter, C. D. (2003) Bacterial phytoene  
1367 synthase: molecular cloning, expression, and characterization of *Erwinia herbicola*  
1368 phytoene synthase, *Biochemistry* *42*, 3359-3365. DOI: <https://doi.org/10.1021/bi0206614>
- 1369 [63] Nagashima, S., Kamimura, A., Shimizu, T., Nakamura-Isaki, S., Aono, E., Sakamoto, K.,  
1370 Ichikawa, N., Nakazawa, H., Sekine, M., Yamazaki, S., Fujita, N., Shimada, K., Hanada,  
1371 S., and Nagashima, K. V. (2012) Complete genome sequence of phototrophic  
1372 betaproteobacterium *Rubrivivax gelatinosus* IL144, *J. Bacteriol.* *194*, 3541-3542. DOI:  
1373 <https://doi.org/10.1128/JB.00511-12>
- 1374 [64] Cunningham, F. X., Jr., and Gantt, E. (2005) A study in scarlet: enzymes of ketocarotenoid  
1375 biosynthesis in the flowers of *Adonis aestivalis*, *Plant J.* *41*, 478-492. DOI:  
1376 <https://doi.org/10.1111/j.1365-313X.2004.02309.x>
- 1377 [65] McFadden, G. I., and Yeh, E. (2016) The apicoplast: now you see it, now you don't, *Int. J.*  
1378 *Parasitol.* DOI: <https://doi.org/10.1016/j.ijpara.2016.08.005>
- 1379 [66] Akhtar, T. A., Surowiecki, P., Siekierska, H., Kania, M., Van Gelder, K., Rea, K. A., Virta,  
1380 L. K. A., Vatta, M., Gawarecka, K., Wojcik, J., Danikiewicz, W., Buszewicz, D.,  
1381 Swiezewska, E., and Surmacz, L. (2017) Polyrenols Are Synthesized by a Plastidial cis-  
1382 Prenyltransferase and Influence Photosynthetic Performance, *Plant Cell* *29*, 1709-1725.  
1383 DOI: <https://doi.org/10.1105/tpc.16.00796>
- 1384 [67] Joyard, J., Ferro, M., Masselon, C., Seigneurin-Berny, D., Salvi, D., Garin, J., and Rolland,  
1385 N. (2009) Chloroplast proteomics and the compartmentation of plastidial isoprenoid  
1386 biosynthetic pathways, *Mol. Plant* *2*, 1154-1180. DOI: <https://doi.org/10.1093/mp/ssp088>
- 1387 [68] Van Gelder, K., Rea, K. A., Virta, L. K. A., Whitnell, K. L., Osborn, M., Vatta, M., Khozin,  
1388 A., Skorupinska-Tudek, K., Surmacz, L., and Akhtar, T. A. (2018) Medium-Chain  
1389 Polyrenols Influence Chloroplast Membrane Dynamics in *Solanum lycopersicum*, *Plant*  
1390 *Cell Physiol.* *59*, 2350-2365. DOI: <https://doi.org/10.1093/pcp/pcy157>
- 1391 [69] Kelly, M., Su, C. Y., Schaber, C., Crowley, J. R., Hsu, F. F., Carlson, J. R., and Odom, A.  
1392 R. (2015) Malaria parasites produce volatile mosquito attractants, *mBio* *6*. DOI:  
1393 <https://doi.org/10.1128/mBio.00235-15>
- 1394 [70] Emami, S. N., Lindberg, B. G., Hua, S., Hill, S. R., Mozuraitis, R., Lehmann, P.,  
1395 Birgersson, G., Borg-Karlson, A. K., Ignell, R., and Faye, I. (2017) A key malaria  
1396 metabolite modulates vector blood seeking, feeding, and susceptibility to infection,  
1397 *Science* *355*, 1076-1080. DOI: <https://doi.org/10.1126/science.aah4563>

- 1398 [71] Miller, J. J., and Odom John, A. R. (2020) The Malaria Metabolite HMBPP Does Not  
1399 Trigger Erythrocyte Terpene Release, *ACS Infect. Dis.* 6, 2567-2572. DOI:  
1400 <https://doi.org/10.1021/acsinfecdis.0c00548>
- 1401 [72] Couto, A. S., Kimura, E. A., Peres, V. J., Uhrig, M. L., and Katzin, A. M. (1999) Active  
1402 isoprenoid pathway in the intra-erythrocytic stages of *Plasmodium falciparum*: presence  
1403 of dolichols of 11 and 12 isoprene units, *Biochem. J.* 341 ( Pt 3), 629-637.
- 1404 [73] Zimbres, F. M., Valenciano, A. L., Merino, E. F., Florentin, A., Holderman, N. R., He, G.,  
1405 Gawarecka, K., Skorupinska-Tudek, K., Fernandez-Murga, M. L., Swiezewska, E.,  
1406 Wang, X., Muralidharan, V., and Cassera, M. B. (2020) Metabolomics profiling reveals  
1407 new aspects of dolichol biosynthesis in *Plasmodium falciparum*, *Sci. Rep.* 10, 13264.  
1408 DOI: <https://doi.org/10.1038/s41598-020-70246-0>
- 1409 [74] Hartley, M. D., and Imperiali, B. (2012) At the membrane frontier: a prospectus on the  
1410 remarkable evolutionary conservation of polyprenols and polyprenyl-phosphates, *Arch.*  
1411 *Biochem. Biophys.* 517, 83-97. DOI: <https://doi.org/10.1016/j.abb.2011.10.018>
- 1412 [75] Swiezewska, E., and Danikiewicz, W. (2005) Polyisoprenoids: structure, biosynthesis and  
1413 function, *Prog. Lipid Res.* 44, 235-258. DOI:  
1414 <https://doi.org/10.1016/j.plipres.2005.05.002>
- 1415 [76] Botte, C. Y., Yamaro-Botte, Y., Rupasinghe, T. W., Mullin, K. A., MacRae, J. I., Spurck,  
1416 T. P., Kalanon, M., Shears, M. J., Coppel, R. L., Crellin, P. K., Marechal, E.,  
1417 McConville, M. J., and McFadden, G. I. (2013) Atypical lipid composition in the purified  
1418 relict plastid (apicoplast) of malaria parasites, *Proc. Natl. Acad. Sci. U. S. A.* 110, 7506-  
1419 7511. DOI: <https://doi.org/10.1073/pnas.1301251110>
- 1420 [77] Tonkin, C. J., van Dooren, G. G., Spurck, T. P., Struck, N. S., Good, R. T., Handman, E.,  
1421 Cowman, A. F., and McFadden, G. I. (2004) Localization of organellar proteins in  
1422 *Plasmodium falciparum* using a novel set of transfection vectors and a new  
1423 immunofluorescence fixation method, *Mol. Biochem. Parasitol.* 137, 13-21.
- 1424 [78] Gallagher, J. R., and Prigge, S. T. (2010) *Plasmodium falciparum* acyl carrier protein crystal  
1425 structures in disulfide-linked and reduced states and their prevalence during blood stage  
1426 growth, *Proteins* 78, 575-588. DOI: <https://doi.org/10.1002/prot.22582>
- 1427 [79] Ganesan, S. M., Morrisey, J. M., Ke, H., Painter, H. J., Laroia, K., Phillips, M. A., Rathod,  
1428 P. K., Mather, M. W., and Vaidya, A. B. (2011) Yeast dihydroorotate dehydrogenase as a  
1429 new selectable marker for *Plasmodium falciparum* transfection, *Mol. Biochem. Parasitol.*  
1430 177, 29-34.
- 1431 [80] Klemba, M., Beatty, W., Gluzman, I., and Goldberg, D. E. (2004) Trafficking of plasmepsin  
1432 II to the food vacuole of the malaria parasite *Plasmodium falciparum*, *J. Cell Biol.* 164,  
1433 47-56.
- 1434 [81] Beck, J. R., Muralidharan, V., Oksman, A., and Goldberg, D. E. (2014) PTEX component  
1435 HSP101 mediates export of diverse malaria effectors into host erythrocytes, *Nature* 511,  
1436 592-595. DOI: <https://doi.org/10.1038/nature13574>
- 1437 [82] Balu, B., Shoue, D. A., Fraser, M. J., and Adams, J. H. (2005) High-efficiency  
1438 transformation of *Plasmodium falciparum* by the lepidopteran transposable element  
1439 piggyBac, *Proc. Natl. Acad. Sci. U. S. A.* 102, 16391-16396. DOI: <https://doi.org/10.1073/Pnas.0504679102>
- 1440  
1441 [83] Spillman, N. J., Beck, J. R., Ganesan, S. M., Niles, J. C., and Goldberg, D. E. (2017) The  
1442 chaperonin TRiC forms an oligomeric complex in the malaria parasite cytosol, *Cell*  
1443 *Microbiol.* 19. DOI: <https://doi.org/10.1111/cmi.12719>

- 1444 [84] Schmittgen, T. D., and Livak, K. J. (2008) Analyzing real-time PCR data by the  
1445 comparative C(T) method, *Nat. Protoc.* 3, 1101-1108. DOI:  
1446 <https://doi.org/10.1038/nprot.2008.73>
- 1447 [85] Rajaram, K., Liu, H. B., and Prigge, S. T. (2020) Redesigned TetR-Aptamer System To  
1448 Control Gene Expression in *Plasmodium falciparum*, *mSphere* 5. DOI:  
1449 <https://doi.org/10.1128/mSphere.00457-20>
- 1450 [86] Rivera, S. M., Christou, P., and Canela-Garayoa, R. (2014) Identification of carotenoids  
1451 using mass spectrometry, *Mass Spectrom. Rev.* 33, 353-372. DOI:  
1452 <https://doi.org/10.1002/mas.21390>  
1453
